# Supplementary material for: Emerging variants of SARS-CoV-2 NSP10 highlight strong functional conservation of its binding to two non-structural proteins, NSP14 and NSP16
Source: eLife. 2023 Dec 21;12:RP87884. doi: 10.7554/eLife.87884 (PMC10735223; doi:10.7554/eLife.87884)
Supplement: Figure 2—source data 1. — The table enlists the sequence accession no., SARS-CoV-2 strain, position, mutated residue, frequency, and % frequency. [file elife-87884-fig2-data1.xlsx]

## Sheet: Sheet1
Accession	Protein	Strain	WildtypeAA	Position	MutatedAA	Frequency	% Frequency	Mutation
EPI_ISL_1231858	NSP10	hCoV-19/USA/CA-RD626-CV007/2021	A	1	S	40	0.001	A1S
EPI_ISL_475701	NSP10	hCoV-19/USA/CA-CSMC85/2020	A	1	G	3	0	A1G
EPI_ISL_1179506	NSP10	hCoV-19/Wales/PHWC-4D6E8D/2021	A	104	V	8402	0.119	A104V
EPI_ISL_1191741	NSP10	hCoV-19/North Macedonia/11220/2021	A	104	T	678	0.01	A104T
EPI_ISL_1237665	NSP10	hCoV-19/USA/TX-HMH-MCoV-27883/2021	A	104	S	159	0.002	A104S
EPI_ISL_1090113	NSP10	hCoV-19/Netherlands/NB-RIVM-13446/2021	A	104	G	40	0.001	A104G
EPI_ISL_2346889	NSP10	hCoV-19/England/ALDP-15A96D2/2021	A	104	D	23	0	A104D
EPI_ISL_1265168	NSP10	hCoV-19/Indonesia/BA-NIHRD-WGS00740/2021	A	104	P	2	0	A104P
EPI_ISL_7547074	NSP10	hCoV-19/USA/OR-TRACE-LINN-100921-1039/2021	A	104	L	2	0	A104L
EPI_ISL_1186417	NSP10	hCoV-19/England/ALDP-1367F22/2021	A	18	V	184	0.003	A18V
EPI_ISL_1288714	NSP10	hCoV-19/Netherlands/OV-RIVM-17062/2021	A	18	S	85	0.001	A18S
EPI_ISL_1238571	NSP10	hCoV-19/USA/TX-HMH-MCoV-28787/2021	A	18	C	78	0.001	A18C
EPI_ISL_3759976	NSP10	hCoV-19/USA/ID-IBL-747463/2021hCoV-19/USA/FL-BPHL-3609/2021	A	18	T	65	0.001	A18T
EPI_ISL_2650478	NSP10	hCoV-19/Poland/KCZ_1.56/2020	A	18	L	1	0	A18L
EPI_ISL_984294	NSP10	hCoV-19/Belgium/UZA-UA-2538/2021	A	18	F	1	0	A18F
EPI_ISL_1226465	NSP10	hCoV-19/USA/NY-Wadsworth-21020538-01/2021	A	20	S	387	0.005	A20S
EPI_ISL_1526295	NSP10	hCoV-19/France/ARA-HCL021056449201/2021	A	20	T	69	0.001	A20T
EPI_ISL_1648962	NSP10	hCoV-19/USA/MI-UM-MHM1217/2021	A	20	V	48	0.001	A20V
EPI_ISL_2884558	NSP10	hCoV-19/Italy/CAL-AMC-21050776-DS/2021	A	20	G	8	0	A20G
EPI_ISL_5378206	NSP10	hCoV-19/USA/TX-HMH-MCoV-61919/2021	A	20	P	1	0	A20P
EPI_ISL_1469240	NSP10	hCoV-19/Indonesia/JI-NIHRD-WGS01186/2021	A	20	N	1	0	A20N
EPI_ISL_3922902	NSP10	hCoV-19/USA/ID-IBL-749249/2021	A	20	C	1	0	A20C
EPI_ISL_1382483	NSP10	hCoV-19/Belgium/rega-4632/2021	A	23	T	148	0.002	A23T
EPI_ISL_1468447	NSP10	hCoV-19/Brazil/SP-2057/2021	A	23	S	87	0.001	A23S
EPI_ISL_653173	NSP10	hCoV-19/USA/FL-BPHL-2020/2020hCoV-19/Denmark/DCGC-85176/2021	A	23	V	12	0	A23V
EPI_ISL_1235838	NSP10	hCoV-19/USA/TX-HMH-MCoV-26058/2021	A	23	L	5	0	A23L
EPI_ISL_1699443	NSP10	hCoV-19/bat/Yunnan/RsYN03/2019	A	23	P	5	0	A23P
EPI_ISL_788221	NSP10	hCoV-19/USA/TX-HMH-MCoV-13070/2020	A	23	D	1	0	A23D
EPI_ISL_1182626	NSP10	hCoV-19/USA/WY-WPHL-20171713/2020	A	24	S	1349	0.019	A24S
EPI_ISL_1181948	NSP10	hCoV-19/USA/DC-DFS-PHL-0191/2020	A	24	V	737	0.01	A24V
EPI_ISL_1196098	NSP10	hCoV-19/USA/MD-IGS-012101204741A/2021	A	24	T	251	0.004	A24T
EPI_ISL_3373673	NSP10	hCoV-19/Pakistan/PPHRL-AH080/2021	A	24	G	15	0	A24G
EPI_ISL_1682199	NSP10	hCoV-19/Switzerland/AG-ETHZ-560518/2020	A	24	L	7	0	A24L
EPI_ISL_3411100	NSP10	hCoV-19/USA/WA-CDC-UW21073158486/2021	A	24	Q	2	0	A24Q
EPI_ISL_7492975	NSP10	hCoV-19/USA/WA-PHL-007403/2021	A	24	D	1	0	A24D
EPI_ISL_1337634	NSP10	hCoV-19/USA/WY-WPHL-21021714/2021	A	26	S	45	0.001	A26S
EPI_ISL_2218915	NSP10	hCoV-19/USA/TX-HMH-MCoV-34933/2020	A	26	L	11	0	A26L
EPI_ISL_2835002	NSP10	hCoV-19/Morocco/LCAM-mohammedia_ELF-A-12/2020	A	26	G	11	0	A26G
EPI_ISL_7509452	NSP10	hCoV-19/USA/CA-CSMC465/2020	A	26	V	8	0	A26V
EPI_ISL_3267717	NSP10	hCoV-19/Sweden/Uppsala-000199811713N2/2021	A	26	C	7	0	A26C
EPI_ISL_5934819	NSP10	hCoV-19/Italy/CAM_IZSM_RD20702444239_CAM_IZSM_COLLI_TIGEM/2021	A	26	T	2	0	A26T
EPI_ISL_7591219	NSP10	hCoV-19/Russia/SPE-RII-2601S/2021	A	26	D	1	0	A26D
EPI_ISL_1178043	NSP10	hCoV-19/England/LOND-1336760/2021	A	32	V	7574	0.107	A32V
EPI_ISL_1187297	NSP10	hCoV-19/England/QEUH-13612C5/2021	A	32	T	1332	0.019	A32T
EPI_ISL_1370406	NSP10	hCoV-19/Netherlands/NH-RIVM-17959/2021	A	32	S	100	0.001	A32S
EPI_ISL_1002055	NSP10	hCoV-19/Switzerland/SH-ETHZ-461012/2021	A	32	P	5	0	A32P
EPI_ISL_744913	NSP10	hCoV-19/Luxembourg/LNS9432832/2020	A	32	G	5	0	A32G
EPI_ISL_8812965	NSP10	hCoV-19/USA/OR-TRACE-LINN-110921-1248/2021	A	32	D	2	0	A32D
EPI_ISL_7509452	NSP10	hCoV-19/USA/CA-CSMC465/2020	A	32	W	1	0	A32W
EPI_ISL_1195552	NSP10	hCoV-19/Spain/MD-IBV-99020691/2020	A	32	L	1	0	A32L
EPI_ISL_1195552	NSP10	hCoV-19/Spain/MD-IBV-99020691/2020	A	4	V	880	0.012	A4V
EPI_ISL_1415096	NSP10	hCoV-19/India/MH-NCCS-87122/2021	A	4	T	181	0.003	A4T
EPI_ISL_4576257	NSP10	hCoV-19/USA/UT-UPHL-210928479163/2021	A	4	S	26	0	A4S
EPI_ISL_511947	NSP10	hCoV-19/India/KA-IB56/2020	A	4	E	2	0	A4E
EPI_ISL_5303926	NSP10	hCoV-19/Italy/UMB-IZSGC-307119.1.22/2021	A	4	P	1	0	A4P
EPI_ISL_1259423	NSP10	hCoV-19/Switzerland/BS-ETHZ-510862/2021	A	54	S	111	0.002	A54S
EPI_ISL_3822622	NSP10	hCoV-19/USA/CO-CDC-ASC210207750/2021	A	54	G	5	0	A54G
EPI_ISL_1017870	NSP10	hCoV-19/USA/WY-WPHL-21011416/2021	A	54	E	4	0	A54E
EPI_ISL_5339262	NSP10	hCoV-19/USA/TX-HMH-MCoV-48926/2021	A	54	P	2	0	A54P
EPI_ISL_8813033	NSP10	hCoV-19/USA/OR-TRACE-LINN-092721-1198/2021	A	54	Q	2	0	A54Q
EPI_ISL_5070329	NSP10	hCoV-19/USA/TX-HMH-MCoV-45728/2021	A	54	V	1	0	A54V
EPI_ISL_1206084	NSP10	hCoV-19/England/CAMC-135973A/2021	A	61	S	380	0.005	A61S
EPI_ISL_6604146	NSP10	hCoV-19/USA/IL-RIPHL_110023_G/2021	A	61	G	2	0	A61G
EPI_ISL_6074014	NSP10	hCoV-19/Canada/SK-NML-216067/2021	A	61	V	1	0	A61V
EPI_ISL_1785718	NSP10	hCoV-19/USA/WA-UW-2021041015314/2021	A	61	T	1	0	A61T
EPI_ISL_3019945	NSP10	hCoV-19/Indonesia/NT-NIHRD-WGS05435/2021	A	61	D	1	0	A61D
EPI_ISL_1226871	NSP10	hCoV-19/USA/NY-Wadsworth-21012232-01/2021	A	71	T	176	0.002	A71T
EPI_ISL_8188587	NSP10	hCoV-19/Nigeria/MRL-OS-2435/2021	A	71	S	24	0	A71S
EPI_ISL_8746673	NSP10	hCoV-19/Turkey/HSGM-F14470/2022	A	71	G	8	0	A71G
EPI_ISL_2206261	NSP10	hCoV-19/USA/TX-HMH-MCoV-36371/2020	A	71	V	2	0	A71V
EPI_ISL_1598656	NSP10	hCoV-19/Switzerland/ZH-ETHZ-561481/2020	A	9	V	413	0.006	A9V
EPI_ISL_1187276	NSP10	hCoV-19/England/QEUH-1362BBA/2021	A	9	T	50	0.001	A9T
EPI_ISL_5074496	NSP10	hCoV-19/USA/TX-HMH-MCoV-42828/2020	A	9	S	31	0	A9S
EPI_ISL_1379763	NSP10	hCoV-19/USA/CA-Stanford-03_S21/2021	A	9	D	28	0	A9D
EPI_ISL_1731080	NSP10	hCoV-19/Bosnia and Herzegovina/AGCK2495/2021	A	9	P	2	0	A9P
EPI_ISL_2546831	NSP10	hCoV-19/India/GJ-ICMR-NIV-INSACOG-GSEQ-3679/2021	A	9	G	1	0	A9G
EPI_ISL_1381376	NSP10	hCoV-19/Romania/Bucuresti_432676/2021	C	103	R	247	0.003	C103R
EPI_ISL_1399507	NSP10	hCoV-19/Portugal/PT4411/2021	C	103	Y	134	0.002	C103Y
EPI_ISL_1498710	NSP10	hCoV-19/Luxembourg/LNS6156758/2021	C	103	S	55	0.001	C103S
EPI_ISL_2129026	NSP10	hCoV-19/Germany/NW-RKI-I-144713/2021	C	103	F	49	0.001	C103F
EPI_ISL_1371409	NSP10	hCoV-19/Netherlands/LI-RIVM-17809/2021	C	103	W	6	0	C103W
EPI_ISL_1750489	NSP10	hCoV-19/Switzerland/ZH-ETHZ-581189/2021	C	103	G	4	0	C103G
EPI_ISL_7547074	NSP10	hCoV-19/USA/OR-TRACE-LINN-100921-1039/2021	C	103	V	1	0	C103V
EPI_ISL_7509044	NSP10	hCoV-19/USA/CA-CSMC317/2021	C	103	T	1	0	C103T
EPI_ISL_1960920	NSP10	hCoV-19/USA/LA-EVTL2551/2021	C	117	Y	6	0	C117Y
EPI_ISL_7227587	NSP10	hCoV-19/USA/NE-CDC-ASC210389625/2021	C	117	F	6	0	C117F
EPI_ISL_2904231	NSP10	hCoV-19/England/PHEC-3317A4/2021	C	117	S	5	0	C117S
EPI_ISL_999172	NSP10	hCoV-19/Scotland/OXON-F57F3B/2021	C	117	R	2	0	C117R
EPI_ISL_5934812	NSP10	hCoV-19/Italy/CAM_IZSM_RD20702689840_CAM_IZSM_COLLI_TIGEM/2021	C	120	S	27	0	C120S
EPI_ISL_1366167	NSP10	hCoV-19/USA/WA-UW-62795/2021	C	120	D	7	0	C120D
EPI_ISL_1074864	NSP10	hCoV-19/USA/TX-HMH-MCoV-20422/2021	C	120	R	5	0	C120R
EPI_ISL_5235797	NSP10	hCoV-19/USA/CA-CDC-ASC210132397/2021	C	120	E	4	0	C120E
EPI_ISL_1420958	NSP10	hCoV-19/USA/NC-CDC-STM-000026342/2021	C	120	F	2	0	C120F
EPI_ISL_1965708	NSP10	hCoV-19/env/Austria/CeMM8198/2021	C	120	Y	2	0	C120Y
EPI_ISL_1360297	NSP10	hCoV-19/India/MH-NEERI-NGP-24942/2020	C	128	W	6	0	C128W
EPI_ISL_8193871	NSP10	hCoV-19/Egypt/NRC-5455NS/2020	C	128	G	5	0	C128G
EPI_ISL_2201777	NSP10	hCoV-19/USA/TX-HMH-MCoV-36273/2020	C	128	F	4	0	C128F
EPI_ISL_8193855	NSP10	hCoV-19/Egypt/NRC-6446/2020	C	128	L	1	0	C128L
EPI_ISL_1098060	NSP10	hCoV-19/USA/NY-PRL-2021_02_19_00P20/2021	C	128	R	1	0	C128R
EPI_ISL_3945044	NSP10	hCoV-19/Brazil/SP-IB_127146/2021	C	128	Y	1	0	C128Y
EPI_ISL_5235941	NSP10	hCoV-19/USA/MI-CDC-ASC210405263/2021	C	128	V	1	0	C128V
EPI_ISL_8054734	NSP10	hCoV-19/France/GES-HMN-21122160217/2021	C	128	S	1	0	C128S
EPI_ISL_1235967	NSP10	hCoV-19/USA/TX-HMH-MCoV-26187/2021	C	130	F	7	0	C130F
EPI_ISL_8193857	NSP10	hCoV-19/Egypt/NRC-6333/2020	C	130	Y	3	0	C130Y
EPI_ISL_8193871	NSP10	hCoV-19/Egypt/NRC-5455NS/2020	C	130	G	2	0	C130G
EPI_ISL_420412	NSP10	hCoV-19/Belgium/BJ-0324192/2020	C	130	S	2	0	C130S
EPI_ISL_4254887	NSP10	hCoV-19/Indonesia/NB-NIHRD-WGS10140/2021	C	130	R	1	0	C130R
EPI_ISL_5934812	NSP10	hCoV-19/Italy/CAM_IZSM_RD20702689840_CAM_IZSM_COLLI_TIGEM/2021	C	130	D	1	0	C130D
EPI_ISL_3299585	NSP10	hCoV-19/Sweden/03_SE600_000199825408N2/2021	C	17	S	8	0	C17S
EPI_ISL_1305635	NSP10	hCoV-19/USA/TX-HMH-MCoV-31127/2021	C	17	L	7	0	C17L
EPI_ISL_6420970	NSP10	hCoV-19/USA/TN-CDC-ASC210443476/2021	C	17	F	2	0	C17F
EPI_ISL_8194867	NSP10	hCoV-19/Egypt/NRC-6469/2020	C	17	V	2	0	C17V
EPI_ISL_3839431	NSP10	hCoV-19/Denmark/DCGC-163469/2021	C	17	W	1	0	C17W
EPI_ISL_1075009	NSP10	hCoV-19/USA/TX-HMH-MCoV-20567/2021	C	17	R	1	0	C17R
EPI_ISL_1258508	NSP10	hCoV-19/USA/NY-PRL-03_09_00K17/2021	C	17	G	1	0	C17G
EPI_ISL_1233087	NSP10	hCoV-19/Sri Lanka/CMC80451/2021	C	41	S	36	0.001	C41S
EPI_ISL_2007874	NSP10	hCoV-19/USA/HI-H211968/2021	C	41	F	28	0	C41F
EPI_ISL_1638284	NSP10	hCoV-19/Germany/SN-RKI-I-071273/2021	C	41	Y	26	0	C41Y
EPI_ISL_5343261	NSP10	hCoV-19/USA/TX-HMH-MCoV-48011/2020	C	41	I	8	0	C41I
EPI_ISL_1415128	NSP10	hCoV-19/India/MH-NCCS-87147/2021	C	41	V	6	0	C41V
EPI_ISL_2420966	NSP10	hCoV-19/Czech Republic/NRL_7862_21/2021	C	41	G	5	0	C41G
EPI_ISL_1326066	NSP10	hCoV-19/England/MILK-13ECFCB/2021	C	41	W	4	0	C41W
EPI_ISL_7410041	NSP10	hCoV-19/USA/PA-CDC-ASC210398864/2021	C	41	R	2	0	C41R
EPI_ISL_5380454	NSP10	hCoV-19/USA/TX-HMH-MCoV-62285/2021	C	41	D	2	0	C41D
EPI_ISL_7591217	NSP10	hCoV-19/Russia/SPE-RII-2596S/2021	C	41	T	1	0	C41T
EPI_ISL_1238027	NSP10	hCoV-19/USA/TX-HMH-MCoV-28245/2021	C	46	Y	39	0.001	C46Y
EPI_ISL_2022930	NSP10	hCoV-19/Scotland/QEUH-155953E/2021	C	46	F	6	0	C46F
EPI_ISL_1296247	NSP10	hCoV-19/Italy/UMB-IZSGC-115976.1.19/2021	C	46	R	4	0	C46R
EPI_ISL_2443994	NSP10	hCoV-19/USA/IN-UND-00173695/2021	C	46	S	2	0	C46S
EPI_ISL_1199891	NSP10	hCoV-19/Sweden/SE00207460/2021	C	46	G	2	0	C46G
EPI_ISL_5300746	NSP10	hCoV-19/Australia/VIC13765/2020	C	46	L	1	0	C46L
EPI_ISL_2782745	NSP10	hCoV-19/USA/CA-CDPH-2000031210/2021	C	73	S	67	0.001	C73S
EPI_ISL_2222949	NSP10	hCoV-19/USA/TX-HMH-MCoV-41384/2021	C	73	R	7	0	C73R
EPI_ISL_2137457	NSP10	hCoV-19/Italy/CAM-TIGEM-IZSM-COLLI-11477/2021	C	73	F	3	0	C73F
EPI_ISL_5476190	NSP10	hCoV-19/Qatar/QA.QU.16.2.B12/2021	C	73	W	2	0	C73W
EPI_ISL_3775914	NSP10	hCoV-19/England/PHEC-T308T8D0/2021	C	73	Q	1	0	C73Q
EPI_ISL_7939844	NSP10	hCoV-19/USA/AZ-CDC-ASC210430481/2021	C	73	G	1	0	C73G
EPI_ISL_3775914	NSP10	hCoV-19/England/PHEC-T308T8D0/2021	C	74	I	19	0	C74I
EPI_ISL_1407486	NSP10	hCoV-19/Switzerland/ZH-ETHZ-520890/2020	C	74	R	2	0	C74R
EPI_ISL_5073131	NSP10	hCoV-19/USA/TX-HMH-MCoV-47587/2021	C	74	W	1	0	C74W
EPI_ISL_539492	NSP10	hCoV-19/India/UT-IMT-AU111/2020	C	74	G	1	0	C74G
EPI_ISL_1237313	NSP10	hCoV-19/USA/TX-HMH-MCoV-27531/2021	C	77	S	18	0	C77S
EPI_ISL_1238141	NSP10	hCoV-19/USA/TX-HMH-MCoV-28359/2021	C	77	R	5	0	C77R
EPI_ISL_1079671	NSP10	hCoV-19/USA/TX-HMH-MCoV-25057/2021	C	77	F	4	0	C77F
EPI_ISL_8564646	NSP10	hCoV-19/USA/CA-Curative-111746/2021	C	77	P	2	0	C77P
EPI_ISL_6584215	NSP10	hCoV-19/USA/AZ-ASU21955/2021	C	77	G	1	0	C77G
EPI_ISL_1217071	NSP10	hCoV-19/Germany/BW-RKI-I-032852/2021	C	79	S	233	0.003	C79S
EPI_ISL_1237313	NSP10	hCoV-19/USA/TX-HMH-MCoV-27531/2021	C	79	L	18	0	C79L
EPI_ISL_1076988	NSP10	hCoV-19/USA/TX-HMH-MCoV-22460/2021	C	79	F	5	0	C79F
EPI_ISL_3364212	NSP10	hCoV-19/USA/NY-GEO-0061/2021	C	79	G	4	0	C79G
EPI_ISL_2189994	NSP10	hCoV-19/USA/TX-HMH-MCoV-31390/2020	C	79	R	2	0	C79R
EPI_ISL_8564646	NSP10	hCoV-19/USA/CA-Curative-111746/2021	C	79	P	2	0	C79P
EPI_ISL_951284	NSP10	hCoV-19/England/OXON-F50345/2021	C	79	W	1	0	C79W
EPI_ISL_2302163	NSP10	hCoV-19/Netherlands/ZH-RIVM-34617/2021	C	90	F	3	0	C90F
EPI_ISL_1039233	NSP10	hCoV-19/Belgium/UZA-UA-00161866/2021	C	90	Y	2	0	C90Y
EPI_ISL_1303444	NSP10	hCoV-19/USA/CA-LACPHL-AF00634/2021	C	90	R	2	0	C90R
EPI_ISL_7728899	NSP10	hCoV-19/Mexico/BCN_INER_IMSS_3329/2021	C	90	L	2	0	C90L
EPI_ISL_5238552	NSP10	hCoV-19/USA/NE-CDC-LC0314853/2021	D	106	N	5	0	D106N
EPI_ISL_2651201	NSP10	hCoV-19/Hong Kong/VM21002186/2021	D	106	G	3	0	D106G
EPI_ISL_7547074	NSP10	hCoV-19/USA/OR-TRACE-LINN-100921-1039/2021	D	106	T	1	0	D106T
EPI_ISL_1703715	NSP10	hCoV-19/India/GJ-ICMR-NIV-INSACOG-GSEQ-278/2021	D	106	V	1	0	D106V
EPI_ISL_7142995	NSP10	hCoV-19/England/BRBR-2C3DA37/2021	D	106	H	1	0	D106H
EPI_ISL_1833099	NSP10	hCoV-19/England/OXON-F810F9/2021	D	106	E	1	0	D106E
EPI_ISL_2223695	NSP10	hCoV-19/USA/TX-HMH-MCoV-40512/2020	D	106	A	1	0	D106A
EPI_ISL_1216211	NSP10	hCoV-19/Germany/HB-RKI-I-032099/2021	D	131	G	496	0.007	D131G
EPI_ISL_1198622	NSP10	hCoV-19/Sweden/SE00207224/2021	D	131	N	84	0.001	D131N
EPI_ISL_1510306	NSP10	hCoV-19/Czech Republic/NRL-1014/2021	D	131	E	68	0.001	D131E
EPI_ISL_1404736	NSP10	hCoV-19/Canada/QC-HGA-U0270819/2020	D	131	V	57	0.001	D131V
EPI_ISL_1620253	NSP10	hCoV-19/USA/TX-DSHS-5359/2021	D	131	A	30	0	D131A
EPI_ISL_420412	NSP10	hCoV-19/Belgium/BJ-0324192/2020	D	131	H	2	0	D131H
EPI_ISL_1224919	NSP10	hCoV-19/USA/TX-HHD-4523531/2021	D	22	N	349	0.005	D22N
EPI_ISL_1604147	NSP10	hCoV-19/Sweden/75712818R9/2021	D	22	E	43	0.001	D22E
EPI_ISL_1080882	NSP10	hCoV-19/USA/TX-HMH-MCoV-25513/2021	D	22	Y	11	0	D22Y
EPI_ISL_3060956	NSP10	hCoV-19/Belgium/Jessa_11-2129-001227ZOL/2021	D	22	G	6	0	D22G
EPI_ISL_1789870	NSP10	hCoV-19/USA/NY-NYULH1434/2021	D	22	A	6	0	D22A
EPI_ISL_3163964	NSP10	hCoV-19/Serbia/Cacak-3401431106/2021	D	22	S	3	0	D22S
EPI_ISL_5074484	NSP10	hCoV-19/USA/TX-HMH-MCoV-42817/2020	D	22	V	1	0	D22V
EPI_ISL_3411100	NSP10	hCoV-19/USA/WA-CDC-UW21073158486/2021	D	22	T	1	0	D22T
EPI_ISL_4967200	NSP10	hCoV-19/USA/CO-CDPHE-2101795823/2021	D	22	H	1	0	D22H
EPI_ISL_1224040	NSP10	hCoV-19/England/QEUH-136A9C7/2021	D	29	A	113	0.002	D29A
EPI_ISL_1187189	NSP10	hCoV-19/England/CAMC-13289B6/2021	D	29	N	35	0	D29N
EPI_ISL_786333	NSP10	hCoV-19/USA/TX-HMH-MCoV-14849/2020	D	29	Y	17	0	D29Y
EPI_ISL_1522595	NSP10	hCoV-19/Luxembourg/LNS1087654/2021	D	29	G	15	0	D29G
EPI_ISL_1197682	NSP10	hCoV-19/Sweden/SE00241299/2021	D	29	E	15	0	D29E
EPI_ISL_873937	NSP10	hCoV-19/England/MILK-1028746/2021	D	29	V	1	0	D29V
EPI_ISL_7509044	NSP10	hCoV-19/USA/CA-CSMC317/2021	D	29	M	1	0	D29M
EPI_ISL_3299581	NSP10	hCoV-19/Sweden/03_SE600_000199818460N2/2021	D	29	L	1	0	D29L
EPI_ISL_7509452	NSP10	hCoV-19/USA/CA-CSMC465/2020	D	29	H	1	0	D29H
EPI_ISL_1383757	NSP10	hCoV-19/Luxembourg/LNS4273725/2021	D	64	E	394	0.006	D64E
EPI_ISL_1007512	NSP10	hCoV-19/England/CAMC-120037B/2021	D	64	N	13	0	D64N
EPI_ISL_1465154	NSP10	hCoV-19/USA/AZ-TG780012/2021	D	64	G	12	0	D64G
EPI_ISL_539322	NSP10	hCoV-19/env/Netherlands/UT-92504-N/2020	D	64	Y	3	0	D64Y
EPI_ISL_7493995	NSP10	hCoV-19/USA/CA-TRACE-SANB-072121-979/2021	D	64	S	2	0	D64S
EPI_ISL_2871668	NSP10	hCoV-19/Germany/NW-KRO-1713/2020	D	64	V	1	0	D64V
EPI_ISL_1205196	NSP10	hCoV-19/USA/UT-UPHL-2103417757/2020	D	82	G	379	0.005	D82G
EPI_ISL_1197983	NSP10	hCoV-19/USA/NM-UNM-02076/2021	D	82	A	272	0.004	D82A
EPI_ISL_1235366	NSP10	hCoV-19/USA/CA-CZB-25037/2021	D	82	N	240	0.003	D82N
EPI_ISL_1182493	NSP10	hCoV-19/USA/AZ-TG745877/2021	D	82	E	147	0.002	D82E
EPI_ISL_6949479	NSP10	hCoV-19/USA/TX-HMH-MCoV-66320/2021	D	82	Y	29	0	D82Y
EPI_ISL_1237313	NSP10	hCoV-19/USA/TX-HMH-MCoV-27531/2021	D	82	P	20	0	D82P
EPI_ISL_7493992	NSP10	hCoV-19/USA/OR-TRACE-LINN-090121-948/2021	D	82	S	5	0	D82S
EPI_ISL_2281567	NSP10	hCoV-19/USA/AZ-TG861983/2021	D	82	H	3	0	D82H
EPI_ISL_2328800	NSP10	hCoV-19/Japan/PG-39827/2021	D	82	V	1	0	D82V
EPI_ISL_8812968	NSP10	hCoV-19/USA/OR-TRACE-LINN-102921-1224/2021	D	82	K	1	0	D82K
EPI_ISL_2308017	NSP10	hCoV-19/Switzerland/ZH-ETHZ-620023/2021	D	82	I	1	0	D82I
EPI_ISL_1197634	NSP10	hCoV-19/Sweden/SE00236335/2021	D	91	A	503	0.007	D91A
EPI_ISL_1216524	NSP10	hCoV-19/Germany/HB-RKI-I-032341/2021	D	91	N	309	0.004	D91N
EPI_ISL_1219951	NSP10	hCoV-19/France/IDF-IPP04469/2021	D	91	G	212	0.003	D91G
EPI_ISL_1376989	NSP10	hCoV-19/England/CAMC-13EE54F/2021	D	91	E	129	0.002	D91E
EPI_ISL_1601233	NSP10	hCoV-19/Sweden/DC107749561/2021	D	91	Y	68	0.001	D91Y
EPI_ISL_3044960	NSP10	hCoV-19/Germany/SN-RKI-I-188779/2021	D	91	V	39	0.001	D91V
EPI_ISL_493086	NSP10	hCoV-19/USA/MO-WUSTL069/2020	D	91	H	1	0	D91H
EPI_ISL_1231553	NSP10	hCoV-19/USA/CA-RD631-CV0029/2021	E	135	K	127	0.002	E135K
EPI_ISL_1251700	NSP10	hCoV-19/Norway/1405/2021	E	135	G	115	0.002	E135G
EPI_ISL_1512074	NSP10	hCoV-19/USA/IN-CDC-STM-000040631/2021	E	135	V	31	0	E135V
EPI_ISL_1040477	NSP10	hCoV-19/Belgium/UZA-UA-TKE292/2021	E	135	Q	20	0	E135Q
EPI_ISL_507007	NSP10	hCoV-19/Iran/IRVSH-01/2020	E	135	A	14	0	E135A
EPI_ISL_2246814	NSP10	hCoV-19/Ireland/D-NVRL-21IRL57356/2021	E	135	D	4	0	E135D
EPI_ISL_1936256	NSP10	hCoV-19/Egypt/ARMY-317/2021	E	6	D	28	0	E6D
EPI_ISL_5536463	NSP10	hCoV-19/Nigeria/MRL-0S-1441/2021	E	6	H	7	0	E6H
EPI_ISL_1133145	NSP10	hCoV-19/Italy/LOM-Pavia-81705/2020	E	6	K	3	0	E6K
EPI_ISL_2200210	NSP10	hCoV-19/USA/TX-HMH-MCoV-33254/2020	E	6	Q	1	0	E6Q
EPI_ISL_1262498	NSP10	hCoV-19/USA/GA-GPHL-0096/2021	E	60	D	226	0.003	E60D
EPI_ISL_1217324	NSP10	hCoV-19/Germany/SN-RKI-I-033083/2021	E	60	G	36	0.001	E60G
EPI_ISL_1740899	NSP10	hCoV-19/England/ALDP-15171ED/2021	E	60	A	11	0	E60A
EPI_ISL_2037149	NSP10	hCoV-19/USA/NY-PRL-2021_0503_00H13/2021	E	60	K	4	0	E60K
EPI_ISL_1210329	NSP10	hCoV-19/Israel/CVL-4458/2021	E	60	Q	1	0	E60Q
EPI_ISL_1333831	NSP10	hCoV-19/England/ALDP-134A602/2021	E	66	D	382	0.005	E66D
EPI_ISL_1309534	NSP10	hCoV-19/England/NORT-1B8F6BE/2021	E	66	A	34	0	E66A
EPI_ISL_2919412	NSP10	hCoV-19/USA/AZ-TG955049/2020	E	66	G	19	0	E66G
EPI_ISL_1604397	NSP10	hCoV-19/Sweden/4010686964/2021	E	66	K	16	0	E66K
EPI_ISL_1066214	NSP10	hCoV-19/Denmark/DCGC-46704/2021	E	66	N	6	0	E66N
EPI_ISL_613957	NSP10	hCoV-19/England/204281587/2020	E	66	V	1	0	E66V
EPI_ISL_5438451	NSP10	hCoV-19/USA/NV-NSPHL-412841/2021	F	110	L	8	0	F110L
EPI_ISL_1406922	NSP10	hCoV-19/Switzerland/SH-ETHZ-440280/2020	F	110	Y	4	0	F110Y
EPI_ISL_1080028	NSP10	hCoV-19/USA/TX-HMH-MCoV-25391/2021	F	110	C	3	0	F110C
EPI_ISL_3502649	NSP10	hCoV-19/Spain/MD-H12O_799/2021	F	110	R	1	0	F110R
EPI_ISL_1399539	NSP10	hCoV-19/Portugal/PT4673/2021	F	16	L	91	0.001	F16L
EPI_ISL_2650478	NSP10	hCoV-19/Poland/KCZ_1.56/2020	F	16	V	2	0	F16V
EPI_ISL_6125402	NSP10	hCoV-19/Japan/20210826-34698/2021	F	16	S	2	0	F16S
EPI_ISL_511947	NSP10	hCoV-19/India/KA-IB56/2020	F	16	C	1	0	F16C
EPI_ISL_1195294	NSP10	hCoV-19/USA/TN-BEM-0006/2021	F	19	C	52	0.001	F19C
EPI_ISL_1236891	NSP10	hCoV-19/USA/TX-HMH-MCoV-27110/2021	F	19	L	20	0	F19L
EPI_ISL_2609676	NSP10	hCoV-19/Sint Maarten/SX-RIVM-38211/2021	F	19	S	8	0	F19S
EPI_ISL_877725	NSP10	hCoV-19/USA/NC-UNC-LCCC0144/2020	F	68	L	41	0.001	F68L
EPI_ISL_4753467	NSP10	hCoV-19/England/PLYM-1F8DB80/2021	F	68	Y	26	0	F68Y
EPI_ISL_8165431	NSP10	hCoV-19/USA/CA-OC-FG-187936/2021	F	68	C	1	0	F68C
EPI_ISL_1738160	NSP10	hCoV-19/USA/PA-CDC-QDX23760183/2021	F	68	I	1	0	F68I
EPI_ISL_5075712	NSP10	hCoV-19/USA/TX-HMH-MCoV-43698/2020	F	68	V	1	0	F68V
EPI_ISL_1367874	NSP10	hCoV-19/USA/MI-MDHHS-SC25119/2021	F	89	L	841	0.012	F89L
EPI_ISL_1201011	NSP10	hCoV-19/Croatia/391/2021	F	89	S	384	0.005	F89S
EPI_ISL_1321661	NSP10	hCoV-19/USA/NC-UNC-0557/2021	F	89	Y	18	0	F89Y
EPI_ISL_2082093	NSP10	hCoV-19/Lithuania/LTU000_NMRVI_88120/2021	F	89	C	17	0	F89C
EPI_ISL_1533457	NSP10	hCoV-19/USA/GA-CDC-2-4106301/2020	F	89	V	9	0	F89V
EPI_ISL_3861204	NSP10	hCoV-19/USA/FL-CDC-ASC210115370/2021	F	89	I	7	0	F89I
EPI_ISL_1051758	NSP10	hCoV-19/England/OXON-F63CBD/2021	F	89	P	1	0	F89P
EPI_ISL_2568991	NSP10	hCoV-19/England/MILK-167C376/2021	G	109	C	49	0.001	G109C
EPI_ISL_2286274	NSP10	hCoV-19/France/PAC-IHU-5284_Illu2/2021	G	109	S	35	0	G109S
EPI_ISL_1185918	NSP10	hCoV-19/USA/CA-ALSR-7137/2021	G	109	V	24	0	G109V
EPI_ISL_2106988	NSP10	hCoV-19/Indonesia/JK-NIHRD-MI2103090/2021	G	109	D	7	0	G109D
EPI_ISL_1303667	NSP10	hCoV-19/USA/TX-HMH-MCoV-29106/2021	G	109	A	2	0	G109A
EPI_ISL_8188844	NSP10	hCoV-19/Malaysia/UNIMAS-19840/2021	G	109	R	1	0	G109R
EPI_ISL_3502649	NSP10	hCoV-19/Spain/MD-H12O_799/2021	G	109	E	1	0	G109E
EPI_ISL_1186547	NSP10	hCoV-19/England/ALDP-1358D93/2021	G	121	S	1069	0.015	G121S
EPI_ISL_1197760	NSP10	hCoV-19/Sweden/SE00247941/2021	G	121	C	603	0.009	G121C
EPI_ISL_2641764	NSP10	hCoV-19/Italy/CAM-TIGEM-IZSM-COLLI-15956/2021	G	121	V	59	0.001	G121V
EPI_ISL_1397804	NSP10	hCoV-19/USA/NY-Wadsworth-21028288-01/2021	G	121	D	30	0	G121D
EPI_ISL_803895	NSP10	hCoV-19/Italy/TUS-UniSi13/2020	G	121	R	12	0	G121R
EPI_ISL_1876999	NSP10	hCoV-19/Denmark/DCGC-68428/2021	G	121	A	10	0	G121A
EPI_ISL_1202337	NSP10	hCoV-19/USA/TX-HMH-MCoV-16627/2020	G	125	C	798	0.011	G125C
EPI_ISL_1218096	NSP10	hCoV-19/Germany/BB-RKI-I-033783/2021	G	125	S	155	0.002	G125S
EPI_ISL_2278719	NSP10	hCoV-19/France/OCC-CHU-TLS-210631392001/2021	G	125	D	26	0	G125D
EPI_ISL_1838052	NSP10	hCoV-19/India/MH-NS1119/2021	G	125	V	19	0	G125V
EPI_ISL_5463084	NSP10	hCoV-19/Italy/CAM_IZSM_RD20702793017/2021	G	125	A	4	0	G125A
EPI_ISL_2220500	NSP10	hCoV-19/USA/TX-HMH-MCoV-35258/2020	G	125	R	1	0	G125R
EPI_ISL_1179001	NSP10	hCoV-19/Wales/PHWC-4D4274/2021	G	127	S	704	0.01	G127S
EPI_ISL_1361285	NSP10	hCoV-19/Switzerland/VD-ETHZ-530048/2020	G	127	C	430	0.006	G127C
EPI_ISL_2213713	NSP10	hCoV-19/USA/TX-HMH-MCoV-38634/2021	G	127	D	20	0	G127D
EPI_ISL_1533775	NSP10	hCoV-19/India/MH-NCCS-CHN21025955/2021	G	127	V	9	0	G127V
EPI_ISL_1108611	NSP10	hCoV-19/England/QEUH-123834D	G	127	R	1	0	G127R
EPI_ISL_1108611	NSP10	hCoV-19/England/QEUH-123834D/2021	G	127	A	1	0	G127A
EPI_ISL_2229778	NSP10	hCoV-19/USA/MA-MASPHL-03721/2021	G	2	S	31	0	G2S
EPI_ISL_1096343	NSP10	hCoV-19/Croatia/HRV000_48/2021	G	2	V	18	0	G2V
EPI_ISL_1597727	NSP10	hCoV-19/USA/NY-MMI040210454/2021	G	2	C	5	0	G2C
EPI_ISL_2224016	NSP10	hCoV-19/USA/TX-HMH-MCoV-40832/2020	G	2	D	3	0	G2D
EPI_ISL_1078335	NSP10	hCoV-19/USA/TX-HMH-MCoV-23805/2021	G	2	A	3	0	G2A
EPI_ISL_1224552	NSP10	hCoV-19/England/CAMC-1347E1C/2021	G	34	R	202	0.003	G34R
EPI_ISL_1253718	NSP10	hCoV-19/USA/CA-Broad_FlowHealth-00083/2021	G	34	V	177	0.003	G34V
EPI_ISL_1531996	NSP10	hCoV-19/USA/CA-ALSR-8545/2020	G	34	E	31	0	G34E
EPI_ISL_1492453	NSP10	hCoV-19/USA/FL-TGH-0168/2021	G	34	A	12	0	G34A
EPI_ISL_2223677	NSP10	hCoV-19/USA/TX-HMH-MCoV-40494/2020	G	34	W	5	0	G34W
EPI_ISL_7948231	NSP10	hCoV-19/USA/MN-CDC-IBX214234319753/2021	G	34	K	2	0	G34K
EPI_ISL_3003579	NSP10	hCoV-19/England/OXON-F8C674/2021	G	34	Q	1	0	G34Q
EPI_ISL_3775914	NSP10	hCoV-19/England/PHEC-T308T8D0/2021	G	34	D	1	0	G34D
EPI_ISL_1236707	NSP10	hCoV-19/USA/TX-HMH-MCoV-26926/2021	G	35	N	267	0.004	G35N
EPI_ISL_1191735	NSP10	hCoV-19/Belgium/IPG-39/2021	G	35	R	123	0.002	G35R
EPI_ISL_1584037	NSP10	hCoV-19/England/CAMC-14D2307/2021	G	35	A	19	0	G35A
EPI_ISL_5012827	NSP10	hCoV-19/Croatia/9317/2021	G	35	E	8	0	G35E
EPI_ISL_7591217	NSP10	hCoV-19/Russia/SPE-RII-2596S/2021	G	35	V	6	0	G35V
EPI_ISL_1475551	NSP10	hCoV-19/England/OXON-F7821D/2021	G	35	S	2	0	G35S
EPI_ISL_7493989	NSP10	hCoV-19/USA/OR-TRACE-LINN-081921-939/2021	G	35	Q	1	0	G35Q
EPI_ISL_3299589	NSP10	hCoV-19/Sweden/03_SE600_000199808206N2/2021	G	35	K	1	0	G35K
EPI_ISL_1009214	NSP10	hCoV-19/Lebanon/LAU-R148/2020	G	50	V	7	0	G50V
EPI_ISL_5236629	NSP10	hCoV-19/USA/FL-CDC-ASC210405121/2021	G	50	S	4	0	G50S
EPI_ISL_1116556	NSP10	hCoV-19/Spain/CT-HUVH-15796/2021	G	50	D	3	0	G50D
EPI_ISL_1080028	NSP10	hCoV-19/USA/TX-HMH-MCoV-25391/2021	G	50	C	3	0	G50C
EPI_ISL_3756846	NSP10	hCoV-19/USA/ID-IBL-746974/2021	G	50	W	1	0	G50W
EPI_ISL_1678327	NSP10	hCoV-19/USA/ID-CDC-2-4173952/2021	G	50	R	1	0	G50R
EPI_ISL_8287406	NSP10	hCoV-19/England/PHEP-YYN3H9O/2021	G	50	A	1	0	G50A
EPI_ISL_1392399	NSP10	hCoV-19/USA/AZ-TG770115/2020	G	52	S	36	0.001	G52S
EPI_ISL_1238183	NSP10	hCoV-19/USA/TX-HMH-MCoV-28401/2021	G	52	V	4	0	G52V
EPI_ISL_5344160	NSP10	hCoV-19/USA/TX-HMH-MCoV-56607/2021	G	52	C	2	0	G52C
EPI_ISL_2673402	NSP10	hCoV-19/Netherlands/LI-RIVM-38306/2021	G	52	T	1	0	G52T
EPI_ISL_1868633	NSP10	hCoV-19/Denmark/DCGC-60062/2020	G	52	D	1	0	G52D
EPI_ISL_1237313	NSP10	hCoV-19/USA/TX-HMH-MCoV-27531/2021	G	69	W	18	0	G69W
EPI_ISL_2698654	NSP10	hCoV-19/USA/MN-UMGC-2873/2021	G	69	V	2	0	G69V
EPI_ISL_3691583	NSP10	hCoV-19/Indonesia/KS-NIHRD-WGS08162/2021	G	69	D	1	0	G69D
EPI_ISL_6166288	NSP10	hCoV-19/USA/WI-CDC-ASC210357136/2021	G	69	C	1	0	G69C
EPI_ISL_5934821	NSP10	hCoV-19/Italy/CAM_IZSM_RD20702444222_CAM_IZSM_COLLI_TIGEM/2021	G	69	N	1	0	G69N
EPI_ISL_1237313	NSP10	hCoV-19/USA/TX-HMH-MCoV-27531/2021	G	70	W	18	0	G70W
EPI_ISL_4228441	NSP10	hCoV-19/Germany/NI-RKI-I-234851/2021	G	70	C	4	0	G70C
EPI_ISL_3857207	NSP10	hCoV-19/USA/TX-CDC-ASC210268987/2021	G	70	V	2	0	G70V
EPI_ISL_1002012	NSP10	hCoV-19/Switzerland/BE-ETHZ-480008/2021	G	70	A	1	0	G70A
EPI_ISL_1659157	NSP10	hCoV-19/Switzerland/BL-ETHZ-570545/2020	G	70	D	1	0	G70D
EPI_ISL_5934821	NSP10	hCoV-19/Italy/CAM_IZSM_RD20702444222_CAM_IZSM_COLLI_TIGEM/2021	G	70	P	1	0	G70P
EPI_ISL_707927	NSP10	hCoV-19/USA/CA-LACPHL-AE00002/2020	G	70	S	1	0	G70S
EPI_ISL_1407488	NSP10	hCoV-19/Switzerland/SO-ETHZ-520536/2020	G	70	R	1	0	G70R
EPI_ISL_8188587	NSP10	hCoV-19/Nigeria/MRL-OS-2435/2021	G	88	R	24	0	G88R
EPI_ISL_1237337	NSP10	hCoV-19/USA/TX-HMH-MCoV-27555/2021	G	88	S	20	0	G88S
EPI_ISL_1237899	NSP10	hCoV-19/USA/TX-HMH-MCoV-28117/2021	G	88	D	15	0	G88D
EPI_ISL_2687474	NSP10	hCoV-19/USA/GA-CDC-ASC210108829/2021	G	88	E	13	0	G88E
EPI_ISL_1203385	NSP10	hCoV-19/USA/TX-HMH-MCoV-17674/2020	G	88	V	10	0	G88V
EPI_ISL_1261839	NSP10	hCoV-19/USA/NY-NYCPHL-003773/2021	G	94	S	105	0.001	G94S
EPI_ISL_1185903	NSP10	hCoV-19/USA/CA-ALSR-7120/2021	G	94	C	104	0.001	G94C
EPI_ISL_4960970	NSP10	hCoV-19/USA/OK-CDC-ASC210000380/2021	G	94	V	2	0	G94V
EPI_ISL_1051796	NSP10	hCoV-19/England/OXON-F64724/2021	G	94	Y	1	0	G94Y
EPI_ISL_3411100	NSP10	hCoV-19/USA/WA-CDC-UW21073158486/2021	G	94	E	1	0	G94E
EPI_ISL_1180438	NSP10	hCoV-19/Ireland/MO-NVRL-85IRL52070/2021	H	48	Y	944	0.013	H48Y
EPI_ISL_1644006	NSP10	hCoV-19/Germany/HE-RKI-I-078798/2021	H	48	R	44	0.001	H48R
EPI_ISL_5305238	NSP10	hCoV-19/Slovenia/363423/2021	H	48	N	4	0	H48N
EPI_ISL_3471564	NSP10	hCoV-19/France/OCC-CHU-TLS-212041467101/2021	H	48	Q	2	0	H48Q
EPI_ISL_8287406	NSP10	hCoV-19/England/PHEP-YYN3H9O/2021	H	48	A	1	0	H48A
EPI_ISL_1244006	NSP10	hCoV-19/England/MILK-1378C18/2021	H	80	Y	285	0.004	H80Y
EPI_ISL_1237313	NSP10	hCoV-19/USA/TX-HMH-MCoV-27531/2021	H	80	P	18	0	H80P
EPI_ISL_2223136	NSP10	hCoV-19/USA/TX-HMH-MCoV-39975/2020	H	80	Q	4	0	H80Q
EPI_ISL_1079533	NSP10	hCoV-19/USA/TX-HMH-MCoV-24919/2021	H	80	N	2	0	H80N
EPI_ISL_8573067	NSP10	hCoV-19/England/ALDP-312252D/2021	H	80	R	1	0	H80R
EPI_ISL_951284	NSP10	hCoV-19/England/OXON-F50345/2021	H	80	I	1	0	H80I
EPI_ISL_5387225	NSP10	hCoV-19/USA/TX-HMH-MCoV-62770/2021	H	80	D	1	0	H80D
EPI_ISL_1237899	NSP10	hCoV-19/USA/TX-HMH-MCoV-28117/2021	H	83	Y	7	0	H83Y
EPI_ISL_1257850	NSP10	hCoV-19/Indonesia/JK-NIHRD-WGS00885/2021	H	83	Q	2	0	H83Q
EPI_ISL_1406918	NSP10	hCoV-19/Switzerland/GR-ETHZ-420071/2020	H	83	R	2	0	H83R
EPI_ISL_2308017	NSP10	hCoV-19/Switzerland/ZH-ETHZ-620023/2021	H	83	I	1	0	H83I
EPI_ISL_7242516	NSP10	hCoV-19/USA/NY-CDC-ASC210458948/2021	H	83	D	1	0	H83D
EPI_ISL_1502588	NSP10	hCoV-19/Poland/PL_P1314/2021	I	38	L	386	0.005	I38L
EPI_ISL_1198625	NSP10	hCoV-19/Sweden/SE00208474/2021	I	38	V	225	0.003	I38V
EPI_ISL_8813033	NSP10	hCoV-19/USA/OR-TRACE-LINN-092721-1198/2021	I	38	T	4	0	I38T
EPI_ISL_3775914	NSP10	hCoV-19/England/PHEC-T308T8D0/2021	I	38	F	3	0	I38F
EPI_ISL_528368	NSP10	hCoV-19/Switzerland/BL-UHB-42203765/2020	I	38	M	2	0	I38M
EPI_ISL_1237313	NSP10	hCoV-19/USA/TX-HMH-MCoV-27531/2021	I	38	Y	1	0	I38Y
EPI_ISL_7509709	NSP10	hCoV-19/USA/CA-CSMC599/2020	I	38	S	1	0	I38S
EPI_ISL_1237657	NSP10	hCoV-19/USA/TX-HMH-MCoV-27875/2021	I	55	T	5846	0.083	I55T
EPI_ISL_1223366	NSP10	hCoV-19/England/CAMC-1359FC9/2021	I	55	L	219	0.003	I55L
EPI_ISL_1232414	NSP10	hCoV-19/Netherlands/GE-RIVM-15739/2021	I	55	V	122	0.002	I55V
EPI_ISL_1420751	NSP10	hCoV-19/Greece/10558/2021	I	55	M	89	0.001	I55M
EPI_ISL_3137254	NSP10	hCoV-19/Netherlands/NB-RIVM-45182/2021	I	55	K	16	0	I55K
EPI_ISL_5738176	NSP10	hCoV-19/Nigeria/MRL-0S-0920/2021	I	55	R	15	0	I55R
EPI_ISL_1238163	NSP10	hCoV-19/USA/TX-HMH-MCoV-28381/2021	I	81	T	1596	0.023	I81T
EPI_ISL_1218904	NSP10	hCoV-19/USA/FL-BPHL-1103/2021	I	81	V	183	0.003	I81V
EPI_ISL_2308017	NSP10	hCoV-19/Switzerland/ZH-ETHZ-620023/2021	I	81	M	45	0.001	I81M
EPI_ISL_1237313	NSP10	hCoV-19/USA/TX-HMH-MCoV-27531/2021	I	81	L	36	0.001	I81L
EPI_ISL_6845915	NSP10	hCoV-19/France/OCC-HCL021206482101/2021	I	81	R	3	0	I81R
EPI_ISL_1704314	NSP10	hCoV-19/Bosnia and Herzegovina/agck2237/2021	I	81	K	2	0	I81K
EPI_ISL_1186067	NSP10	hCoV-19/USA/NMDOH-2021066201/2021	I	99	V	312	0.004	I99V
EPI_ISL_1290256	NSP10	hCoV-19/Sweden/SE00267717/2021	I	99	M	93	0.001	I99M
EPI_ISL_1504726	NSP10	hCoV-19/England/CAMC-14A6560/2021	I	99	L	40	0.001	I99L
EPI_ISL_786742	NSP10	hCoV-19/USA/TX-HMH-MCoV-15258/2020	I	99	T	6	0	I99T
EPI_ISL_7547074	NSP10	hCoV-19/USA/OR-TRACE-LINN-100921-1039/2021	I	99	Y	1	0	I99Y
EPI_ISL_1913072	NSP10	hCoV-19/Morocco/FMP-222/2021	I	99	F	1	0	I99F
EPI_ISL_1443538	NSP10	hCoV-19/Croatia/967/2021	K	113	R	59	0.001	K113R
EPI_ISL_1023835	NSP10	hCoV-19/Brazil/RJ-NIL3PL04/2020	K	113	Y	4	0	K113Y
EPI_ISL_2332877	NSP10	hCoV-19/USA/WA-CDC-UW21051421941/2021	K	113	V	2	0	K113V
EPI_ISL_1539123	NSP10	hCoV-19/Poland/NIPH-NIH_ECDC-1941/2021	K	124	R	314	0.004	K124R
EPI_ISL_1182548	NSP10	hCoV-19/Brazil/MG-FUNED-02131-21/2021	K	124	N	155	0.002	K124N
EPI_ISL_1412375	NSP10	hCoV-19/England/ALDP-1438509/2021	K	124	Q	50	0.001	K124Q
EPI_ISL_1238380	NSP10	hCoV-19/USA/TX-HMH-MCoV-28596/2021	K	124	E	42	0.001	K124E
EPI_ISL_1074864	NSP10	hCoV-19/USA/TX-HMH-MCoV-20422/2021	K	124	T	19	0	K124T
EPI_ISL_5463112	NSP10	hCoV-19/Italy/CAM_IZSM_RD20702688972/2021	K	124	I	17	0	K124I
EPI_ISL_5235941	NSP10	hCoV-19/USA/MI-CDC-ASC210405263/2021	K	124	M	1	0	K124M
EPI_ISL_7677299	NSP10	hCoV-19/Russia/KDA-RII-MH37775S/2021	K	124	A	1	0	K124A
EPI_ISL_1215119	NSP10	hCoV-19/Germany/BY-RKI-I-031175/2021	K	25	R	503	0.007	K25R
EPI_ISL_2100032	NSP10	hCoV-19/Spain/AN-IBV-99009742/2020	K	25	N	15	0	K25N
EPI_ISL_5216723	NSP10	hCoV-19/USA/IL-CDC-ASC210186447/2021	K	25	T	7	0	K25T
EPI_ISL_3411100	NSP10	hCoV-19/USA/WA-CDC-UW21073158486/2021	K	25	E	2	0	K25E
EPI_ISL_8618964	NSP10	hCoV-19/China/IVDC-DL-49/2021	K	25	I	1	0	K25I
EPI_ISL_8806458	NSP10	hCoV-19/India/GA-NCCS-3055100230611/2021	K	25	Q	1	0	K25Q
EPI_ISL_410540	NSP10	hCoV-19/pangolin/Guangxi/P5L/2017	K	28	R	74	0.001	K28R
EPI_ISL_1675286	NSP10	hCoV-19/South Korea/KDCA2990/2021	K	28	N	6	0	K28N
EPI_ISL_5084929	NSP10	hCoV-19/USA/TX-HMH-MCoV-44666/2020	K	28	E	3	0	K28E
EPI_ISL_3299585	NSP10	hCoV-19/Sweden/03_SE600_000199825408N2/2021	K	28	T	2	0	K28T
EPI_ISL_2731935	NSP10	hCoV-19/England/BHRT-24B4CC1/2020	K	28	I	1	0	K28I
EPI_ISL_3922920	NSP10	hCoV-19/USA/ID-IBL-749558/2021	K	28	Q	1	0	K28Q
EPI_ISL_3299581	NSP10	hCoV-19/Sweden/03_SE600_000199818460N2/2021	K	28	S	1	0	K28S
EPI_ISL_3922902	NSP10	hCoV-19/USA/ID-IBL-749249/2021	K	43	L	275	0.004	K43L
EPI_ISL_1210392	NSP10	hCoV-19/Netherlands/LI-MUMC-1165/2021	K	43	R	152	0.002	K43R
EPI_ISL_1203385	NSP10	hCoV-19/USA/TX-HMH-MCoV-17674/2020	K	43	N	83	0.001	K43N
EPI_ISL_483625	NSP10	hCoV-19/Vietnam/NIHE/2020	K	43	E	5	0	K43E
EPI_ISL_2797422	NSP10	hCoV-19/USA/CA-CDPH-2000016874/2021	K	43	T	2	0	K43T
EPI_ISL_2223395	NSP10	hCoV-19/USA/TX-HMH-MCoV-40232/2020	K	43	M	2	0	K43M
EPI_ISL_1475551	NSP10	hCoV-19/England/OXON-F7821D/2021	K	43	V	1	0	K43V
EPI_ISL_2214813	NSP10	hCoV-19/USA/TX-HMH-MCoV-39117/2020	K	43	H	1	0	K43H
EPI_ISL_1620300	NSP10	hCoV-19/USA/TX-DSHS-5374/2021	K	87	R	102	0.001	K87R
EPI_ISL_1401252	NSP10	hCoV-19/Bulgaria/21BG-EU_000770_Pl8/2021	K	87	N	93	0.001	K87N
EPI_ISL_2450586	NSP10	hCoV-19/Russia/AMU-RII-MH18356S/2021	K	87	T	4	0	K87T
EPI_ISL_6262428	NSP10	hCoV-19/USA/OR-TRACE-LINC-012521-746/2021	K	87	L	1	0	K87L
EPI_ISL_1075440	NSP10	hCoV-19/USA/TX-HMH-MCoV-20996/2021	K	87	I	1	0	K87I
EPI_ISL_8812990	NSP10	hCoV-19/USA/OR-TRACE-LINN-111221-1251/2021	K	93	R	34	0	K93R
EPI_ISL_2735764	NSP10	hCoV-19/England/OXON-F87433/2020	K	93	N	2	0	K93N
EPI_ISL_840219	NSP10	hCoV-19/England/OXON-F3FAB0/2020	K	93	T	1	0	K93T
EPI_ISL_840219	NSP10	hCoV-19/England/OXON-F3FAB0/2020	K	93	S	1	0	K93S
EPI_ISL_1078417	NSP10	hCoV-19/USA/TX-HMH-MCoV-23887/2021	K	93	I	1	0	K93I
EPI_ISL_1182865	NSP10	hCoV-19/Canada/ON-PHL-20-00211/2020	K	95	R	2064	0.029	K95R
EPI_ISL_666841	NSP10	hCoV-19/USA/FL-BPHL-2219/2020	K	95	N	47	0.001	K95N
EPI_ISL_7829696	NSP10	hCoV-19/India/OR-ILSGS08109/2021	K	95	Q	13	0	K95Q
EPI_ISL_1682211	NSP10	hCoV-19/Switzerland/AG-ETHZ-560441/2020	K	95	M	7	0	K95M
EPI_ISL_5203766	NSP10	hCoV-19/USA/PA-CDC-STM-000735380/2021	K	95	T	5	0	K95T
EPI_ISL_3411100	NSP10	hCoV-19/USA/WA-CDC-UW21073158486/2021	K	95	E	1	0	K95E
EPI_ISL_1475739	NSP10	hCoV-19/Northern Ireland/OXON-F7D807/2021	K	95	W	1	0	K95W
EPI_ISL_1195828	NSP10	hCoV-19/USA/NY-NYULH537/2021	L	112	F	197	0.003	L112F
EPI_ISL_1186119	NSP10	hCoV-19/Romania/B-4275/2021	L	112	I	180	0.003	L112I
EPI_ISL_1494402	NSP10	hCoV-19/USA/IL-IDPH-RAN-C-001087/2020	L	112	V	4	0	L112V
EPI_ISL_5102475	NSP10	hCoV-19/Switzerland/ZH-ETHZ-34232298/2021	L	112	H	1	0	L112H
EPI_ISL_4434853	NSP10	hCoV-19/USA/WA-UW-21081663360/2021	L	112	S	1	0	L112S
EPI_ISL_2106988	NSP10	hCoV-19/Indonesia/JK-NIHRD-MI2103090/2021	L	112	R	1	0	L112R
EPI_ISL_1195158	NSP10	hCoV-19/Switzerland/ZH-ETHZ-510250/2021	L	133	F	1575	0.022	L133F
EPI_ISL_1278064	NSP10	hCoV-19/USA/GA-EHC-230X/2020	L	133	I	145	0.002	L133I
EPI_ISL_3469618	NSP10	hCoV-19/England/ALDP-1B76A18/2021	L	133	H	39	0.001	L133H
EPI_ISL_1469063	NSP10	hCoV-19/USA/CA-SEARCH-8218/2021	L	133	R	30	0	L133R
EPI_ISL_4948868	NSP10	hCoV-19/Papua New Guinea/PNG1674/2021	L	133	P	10	0	L133P
EPI_ISL_4603200	NSP10	hCoV-19/Mexico/TAB_InDRE_FB39305_S7236/2021	L	133	V	4	0	L133V
EPI_ISL_5235941	NSP10	hCoV-19/USA/MI-CDC-ASC210405263/2021	L	133	N	1	0	L133N
EPI_ISL_5934812	NSP10	hCoV-19/Italy/CAM_IZSM_RD20702689840_CAM_IZSM_COLLI_TIGEM/2021	L	133	C	1	0	L133C
EPI_ISL_1180058	NSP10	hCoV-19/England/SHEF-10C7D65/2021	L	138	F	3388	0.048	L138F
EPI_ISL_2681523	NSP10	hCoV-19/Greece/14557/2021	L	138	R	1148	0.016	L138R
EPI_ISL_1210631	NSP10	hCoV-19/Germany/NW-RKI-I-027600/2021	L	138	I	255	0.004	L138I
EPI_ISL_1383960	NSP10	hCoV-19/Luxembourg/LNS0524424/2021	L	138	P	13	0	L138P
EPI_ISL_1699443	NSP10	hCoV-19/bat/Yunnan/RsYN03/2019	L	138	M	4	0	L138M
EPI_ISL_2190289	NSP10	hCoV-19/USA/TX-HMH-MCoV-31653/2020	L	14	S	3	0	L14S
EPI_ISL_3756846	NSP10	hCoV-19/USA/ID-IBL-746974/2021	L	14	I	2	0	L14I
EPI_ISL_8064584	NSP10	hCoV-19/USA/NY-PA-PBRI-CT-1658/2021	L	14	F	1	0	L14F
EPI_ISL_1183976	NSP10	hCoV-19/USA/AZ-TG745386/2021	L	31	I	82	0.001	L31I
EPI_ISL_1180845	NSP10	hCoV-19/Austria/CeMM4165/2021	L	31	Q	57	0.001	L31Q
EPI_ISL_5831814	NSP10	hCoV-19/Turkey/HSGM-E16574/2021	L	31	V	6	0	L31V
EPI_ISL_2873507	NSP10	hCoV-19/USA/TX-CDC-FG-038910/2021	L	31	R	4	0	L31R
EPI_ISL_1475551	NSP10	hCoV-19/England/OXON-F7821D/2021	L	31	P	2	0	L31P
EPI_ISL_7509452	NSP10	hCoV-19/USA/CA-CSMC465/2020	L	31	Y	1	0	L31Y
EPI_ISL_7778213	NSP10	hCoV-19/USA/ID-IBL-756873/2021	L	45	C	275	0.004	L45C
EPI_ISL_2965532	NSP10	hCoV-19/USA/NY-PRL-2021_03_09_00A10/2021	L	45	F	5	0	L45F
EPI_ISL_6938346	NSP10	hCoV-19/USA/OR-TRACE-LINC-100620-777/2020	L	45	V	4	0	L45V
EPI_ISL_707962	NSP10	hCoV-19/Germany/SL-SU-10431123/2020	L	45	S	2	0	L45S
EPI_ISL_1238027	NSP10	hCoV-19/USA/TX-HMH-MCoV-28245/2021	L	45	M	1	0	L45M
EPI_ISL_1273140	NSP10	hCoV-19/Belgium/UGent-2441/2021	L	75	M	98	0.001	L75M
EPI_ISL_1237313	NSP10	hCoV-19/USA/TX-HMH-MCoV-27531/2021	L	75	V	18	0	L75V
EPI_ISL_547877	NSP10	hCoV-19/India/TG-NIV-906/2020	L	75	Q	1	0	L75Q
EPI_ISL_1731047	NSP10	hCoV-19/Bosnia and Herzegovina/AGCOB788/2021	L	92	F	362	0.005	L92F
EPI_ISL_3530648	NSP10	hCoV-19/Denmark/DCGC-153399/2021	L	92	V	16	0	L92V
EPI_ISL_1657408	NSP10	hCoV-19/Ireland/WW-NVRL-e88IRL57363/2021	L	92	S	7	0	L92S
EPI_ISL_8812990	NSP10	hCoV-19/USA/OR-TRACE-LINN-111221-1251/2021	L	92	K	2	0	L92K
EPI_ISL_1415847	NSP10	hCoV-19/England/CAMC-1419D24/2021	M	122	I	1264	0.018	M122I
EPI_ISL_1188758	NSP10	hCoV-19/England/ALDP-1338D4E/2021	M	122	T	449	0.006	M122T
EPI_ISL_1189337	NSP10	hCoV-19/England/MILK-135517C/2021	M	122	V	274	0.004	M122V
EPI_ISL_5235862	NSP10	hCoV-19/USA/TN-CDC-ASC210143699/2021	M	122	L	70	0.001	M122L
EPI_ISL_1327494	NSP10	hCoV-19/England/CAMC-13D4807/2021	M	122	K	17	0	M122K
EPI_ISL_1789421	NSP10	hCoV-19/USA/WA-UW-2021041254584/2021	M	122	R	15	0	M122R
EPI_ISL_553576	NSP10	hCoV-19/England/ALDP-95A921/2020	M	122	Q	8	0	M122Q
EPI_ISL_5235589	NSP10	hCoV-19/USA/TX-CDC-ASC210134473/2021	M	122	Y	1	0	M122Y
EPI_ISL_1079225	NSP10	hCoV-19/USA/TX-HMH-MCoV-24643/2021	M	137	K	1040	0.015	M137K
EPI_ISL_1212385	NSP10	hCoV-19/Germany/NW-RKI-I-029272/2021	M	137	I	1027	0.015	M137I
EPI_ISL_1181286	NSP10	hCoV-19/Germany/NW-UBI-164/2020	M	137	V	593	0.008	M137V
EPI_ISL_1305593	NSP10	hCoV-19/USA/TX-HMH-MCoV-31081/2021	M	137	T	457	0.006	M137T
EPI_ISL_2661587	NSP10	hCoV-19/Czech Republic/NRL_8873/2021	M	137	R	198	0.003	M137R
EPI_ISL_1348384	NSP10	hCoV-19/Germany/BW-RKI-I-041207/2021	M	137	L	189	0.003	M137L
EPI_ISL_5070263	NSP10	hCoV-19/USA/TX-HMH-MCoV-45674/2021	M	44	R	276	0.004	M44R
EPI_ISL_1271098	NSP10	hCoV-19/Canada/ON-PHL-20-01855-v2/2020	M	44	I	27	0	M44I
EPI_ISL_6463087	NSP10	hCoV-19/Papua New Guinea/PNG981/2021	M	44	C	11	0	M44C
EPI_ISL_3214083	NSP10	hCoV-19/USA/TX-CDC-QDX26763986/2021	M	44	V	9	0	M44V
EPI_ISL_1475551	NSP10	hCoV-19/England/OXON-F7821D/2021	M	44	L	4	0	M44L
EPI_ISL_2214813	NSP10	hCoV-19/USA/TX-HMH-MCoV-39117/2020	M	44	T	2	0	M44T
EPI_ISL_1384176	NSP10	hCoV-19/Luxembourg/LNS9978115/2020	M	63	V	336	0.005	M63V
EPI_ISL_1251908	NSP10	hCoV-19/Norway/2311/2021	M	63	T	250	0.004	M63T
EPI_ISL_1253719	NSP10	hCoV-19/USA/MA-Broad_CRSP-01154/2021	M	63	I	223	0.003	M63I
EPI_ISL_2351451	NSP10	hCoV-19/France/OCC-CHU-TLS-210361495901/2021	M	63	K	25	0	M63K
EPI_ISL_7261598	NSP10	hCoV-19/USA/NY-Wadsworth-21100933-01/2021	M	63	R	11	0	M63R
EPI_ISL_7422770	NSP10	hCoV-19/Germany/NW-RKI-I-357626/2021	M	63	L	4	0	M63L
EPI_ISL_2377691	NSP10	hCoV-19/USA/OR-TRACE-BENT-031521-434/2021	N	10	D	3	0	N10D
EPI_ISL_5074061	NSP10	hCoV-19/USA/TX-HMH-MCoV-42607/2020	N	10	Y	1	0	N10Y
EPI_ISL_964882	NSP10	hCoV-19/Bosnia and Herzegovina/AGC-219/2021	N	10	T	1	0	N10T
EPI_ISL_5086857	NSP10	hCoV-19/USA/TX-HMH-MCoV-46281/2020	N	10	S	1	0	N10S
EPI_ISL_1704779	NSP10	hCoV-19/Bosnia and Herzegovina/AGCOB807/2021	N	10	K	1	0	N10K
EPI_ISL_3178793	NSP10	hCoV-19/England/OXON-FA5A6A/2021	N	105	K	405	0.006	N105K
EPI_ISL_1232654	NSP10	hCoV-19/Netherlands/NH-RIVM-15979/2021	N	105	S	298	0.004	N105S
EPI_ISL_1300456	NSP10	hCoV-19/Chile/AR-192891/2020	N	105	T	30	0	N105T
EPI_ISL_1208442	NSP10	hCoV-19/Spain/CT-HUGTiPR005TQ1D4/2021	N	105	D	10	0	N105D
EPI_ISL_2110433	NSP10	hCoV-19/Germany/un-RKI-I-125689/2021	N	105	Y	7	0	N105Y
EPI_ISL_1915522	NSP10	hCoV-19/Indonesia/JK-NIHRD-MI2104087/2021	N	105	H	2	0	N105H
EPI_ISL_8950397	NSP10	hCoV-19/USA/NY-CDC-ASC210499601/2021	N	105	I	2	0	N105I
EPI_ISL_7547074	NSP10	hCoV-19/USA/OR-TRACE-LINN-100921-1039/2021	N	105	M	1	0	N105M
EPI_ISL_1402427	NSP10	hCoV-19/Uzbekistan/Tashkent-CGB-08/2021	N	114	T	347	0.005	N114T
EPI_ISL_1508928	NSP10	hCoV-19/USA/CA-LACPHL-AF00839/2021	N	114	S	91	0.001	N114S
EPI_ISL_5519038	NSP10	hCoV-19/USA/MN-CDC-ASC210087009/2021	N	114	K	20	0	N114K
EPI_ISL_1238482	NSP10	hCoV-19/USA/TX-HMH-MCoV-28698/2021	N	114	H	7	0	N114H
EPI_ISL_3869486	NSP10	hCoV-19/Ghana/WACCBIP-GS1005/2021	N	114	Y	3	0	N114Y
EPI_ISL_2936122	NSP10	hCoV-19/Turkey/HSGM-B3268/2021	N	114	D	3	0	N114D
EPI_ISL_1234167	NSP10	hCoV-19/USA/CO-CDPHE-2100509191/2021	N	3	S	587	0.008	N3S
EPI_ISL_1181401	NSP10	hCoV-19/Brazil/MA-FIOCRUZ-6876/2021	N	3	K	238	0.003	N3K
EPI_ISL_1140468	NSP10	hCoV-19/Germany/NW-RKI-I-010342/2020	N	3	Y	180	0.003	N3Y
EPI_ISL_7459827	NSP10	hCoV-19/USA/VA-VCUVAS3-UYMQ368762/2021	N	3	T	68	0.001	N3T
EPI_ISL_2772399	NSP10	hCoV-19/Japan/PG-58746/2021	N	3	I	32	0	N3I
EPI_ISL_1703718	NSP10	hCoV-19/India/MH-ICMR-NIV-INSACOG-VOC-68/2020	N	3	D	17	0	N3D
EPI_ISL_860002	NSP10	hCoV-19/United Arab Emirates/4223/2020	N	3	H	9	0	N3H
EPI_ISL_1218072	NSP10	hCoV-19/Germany/BB-RKI-I-033759/2021	N	40	S	89	0.001	N40S
EPI_ISL_2365266	NSP10	hCoV-19/Greece/210181/2021	N	40	K	12	0	N40K
EPI_ISL_5295728	NSP10	hCoV-19/Australia/VIC8136/2020	N	40	L	10	0	N40L
EPI_ISL_1269404	NSP10	hCoV-19/USA/WI-WSLH-210711/2020	N	40	I	6	0	N40I
EPI_ISL_867135	NSP10	hCoV-19/England/OXON-F4B1BC/2021	N	40	R	2	0	N40R
EPI_ISL_1420635	NSP10	hCoV-19/Brazil/RJ-IC01044_57-20/2020	N	40	T	2	0	N40T
EPI_ISL_2194382	NSP10	hCoV-19/Italy/CAM-TIGEM-IZSM-COLLI-13148/2021	N	40	D	2	0	N40D
EPI_ISL_1475551	NSP10	hCoV-19/England/OXON-F7821D/2021	N	40	W	1	0	N40W
EPI_ISL_7547085	NSP10	hCoV-19/USA/OR-TRACE-LINN-090321-1100/2021	N	40	V	1	0	N40V
EPI_ISL_2214813	NSP10	hCoV-19/USA/TX-HMH-MCoV-39117/2020	N	40	C	1	0	N40C
EPI_ISL_1487739	NSP10	hCoV-19/England/QEUH-147E4BF/2021	N	62	S	93	0.001	N62S
EPI_ISL_1237883	NSP10	hCoV-19/USA/TX-HMH-MCoV-28101/2021	N	62	T	81	0.001	N62T
EPI_ISL_1264229	NSP10	hCoV-19/England/MILK-13984FC/2021	N	62	H	38	0.001	N62H
EPI_ISL_1404616	NSP10	hCoV-19/USA/NJ-siP-179571/2021	N	62	Y	25	0	N62Y
EPI_ISL_2425899	NSP10	hCoV-19/Norway/2327/2020	N	62	K	13	0	N62K
EPI_ISL_1861603	NSP10	hCoV-19/Denmark/DCGC-53549/2020	N	85	D	592	0.008	N85D
EPI_ISL_1217909	NSP10	hCoV-19/Germany/NW-RKI-I-033604/2021	N	85	S	588	0.008	N85S
EPI_ISL_1363228	NSP10	hCoV-19/USA/AZ-TG768240/2020	N	85	K	28	0	N85K
EPI_ISL_1413428	NSP10	hCoV-19/England/ALDP-142F15C/2021	N	85	T	20	0	N85T
EPI_ISL_573621	NSP10	hCoV-19/England/QEUH-9BAB1A/2020	N	85	H	10	0	N85H
EPI_ISL_478123	NSP10	hCoV-19/Scotland/CVR3795/2020	N	85	I	7	0	N85I
EPI_ISL_1453294	NSP10	hCoV-19/England/QEUH-14549CF/2021	N	85	Y	5	0	N85Y
EPI_ISL_8813001	NSP10	hCoV-19/USA/OR-TRACE-LINN-110121-1228/2021	N	85	F	2	0	N85F
EPI_ISL_1564628	NSP10	hCoV-19/England/ALDP-14D5049/2021	P	100	S	16	0	P100S
EPI_ISL_1228599	NSP10	hCoV-19/South Korea/KDCA1866/2021	P	100	H	8	0	P100H
EPI_ISL_7493986	NSP10	hCoV-19/USA/OR-TRACE-LINN-051121-911/2021	P	100	Y	4	0	P100Y
EPI_ISL_1237074	NSP10	hCoV-19/USA/TX-HMH-MCoV-27292/2021	P	100	L	4	0	P100L
EPI_ISL_1883973	NSP10	hCoV-19/Denmark/DCGC-75402/2020	P	100	T	3	0	P100T
EPI_ISL_7509044	NSP10	hCoV-19/USA/CA-CSMC317/2021	P	100	V	1	0	P100V
EPI_ISL_5536462	NSP10	hCoV-19/Nigeria/MRL-0S-0446/2021	P	100	R	1	0	P100R
EPI_ISL_7697905	NSP10	hCoV-19/USA/NY-CDC-FG-188621/2021	P	100	A	1	0	P100A
EPI_ISL_1448392	NSP10	hCoV-19/USA/WA-UW-67931/2021	P	107	H	40	0.001	P107H
EPI_ISL_1304761	NSP10	hCoV-19/USA/TX-HMH-MCoV-30208/2020	P	107	S	7	0	P107S
EPI_ISL_1922121	NSP10	hCoV-19/Turkey/HSGM-13488/2021	P	107	L	3	0	P107L
EPI_ISL_2222635	NSP10	hCoV-19/USA/TX-HMH-MCoV-39896/2020	P	107	T	1	0	P107T
EPI_ISL_8502643	NSP10	hCoV-19/USA/UT-UPHL-220107662555/2021	P	107	A	1	0	P107A
EPI_ISL_1217200	NSP10	hCoV-19/Finland/13M43S4/2020	P	136	S	1139	0.016	P136S
EPI_ISL_1195721	NSP10	hCoV-19/Croatia/HRV000_260/2021	P	136	L	938	0.013	P136L
EPI_ISL_1505126	NSP10	hCoV-19/England/CAMC-14ABDDC/2021	P	136	H	576	0.008	P136H
EPI_ISL_1223972	NSP10	hCoV-19/England/QEUH-1368E8E/2021	P	136	T	382	0.005	P136T
EPI_ISL_1133149	NSP10	hCoV-19/Italy/LOM-Pavia-63095/2020	P	136	I	2	0	P136I
EPI_ISL_1198837	NSP10	hCoV-19/Japan/IC-0830/2021	P	37	S	823	0.012	P37S
EPI_ISL_2839554	NSP10	hCoV-19/USA/IN-UND-00115007/2021	P	37	Q	19	0	P37Q
EPI_ISL_1500129	NSP10	hCoV-19/Poland/PL_P1282/2021	P	37	T	12	0	P37T
EPI_ISL_3299581	NSP10	hCoV-19/Sweden/03_SE600_000199818460N2/2021	P	37	L	8	0	P37L
EPI_ISL_867135	NSP10	hCoV-19/England/OXON-F4B1BC/2021	P	37	I	3	0	P37I
EPI_ISL_7509709	NSP10	hCoV-19/USA/CA-CSMC599/2020	P	37	R	2	0	P37R
EPI_ISL_1219552	NSP10	hCoV-19/Latvia/746/2021	P	59	T	371	0.005	P59T
EPI_ISL_2146929	NSP10	hCoV-19/USA/NC-CDC-ASC210059840/2021	P	59	S	4	0	P59S
EPI_ISL_2202137	NSP10	hCoV-19/USA/TX-HMH-MCoV-33925/2020	P	59	L	4	0	P59L
EPI_ISL_6425266	NSP10	hCoV-19/deer/USA/IA-208331/2020	P	59	Q	3	0	P59Q
EPI_ISL_8517255	NSP10	hCoV-19/England/PHEC-3Z07AZ53/2021	P	59	K	2	0	P59K
EPI_ISL_876934	NSP10	hCoV-19/USA/FL-QDX-3455/2020	P	59	A	2	0	P59A
EPI_ISL_1284322	NSP10	hCoV-19/Indonesia/BT-EIJK277/2021	P	8	S	1752	0.025	P8S
EPI_ISL_1201439	NSP10	hCoV-19/Costa Rica/INC-0269/2021	P	8	L	559	0.008	P8L
EPI_ISL_1233374	NSP10	hCoV-19/USA/MA-MASPHL-02170/2021	P	8	H	83	0.001	P8H
EPI_ISL_2969326	NSP10	hCoV-19/USA/CA-CDPH-2000018394/2021	P	8	T	40	0.001	P8T
EPI_ISL_8317335	NSP10	hCoV-19/Czech Republic/NRL_17841/2021	P	8	Y	1	0	P8Y
EPI_ISL_5623845	NSP10	hCoV-19/Turkey/HSGM-E11563/2021	P	8	F	1	0	P8F
EPI_ISL_2374344	NSP10	hCoV-19/France/CVL-IPP12632/2021	P	8	A	1	0	P8A
EPI_ISL_1179141	NSP10	hCoV-19/Wales/PHWC-4D4E70/2021	P	84	S	3270	0.046	P84S
EPI_ISL_1181930	NSP10	hCoV-19/USA/WY-WPHL-20159847/2020	P	84	L	2346	0.033	P84L
EPI_ISL_1390947	NSP10	hCoV-19/Canada/QC-HCLM-7056122711/2020	P	84	Q	349	0.005	P84Q
EPI_ISL_1587025	NSP10	hCoV-19/USA/WA-S5801/2021	P	84	T	23	0	P84T
EPI_ISL_1814376	NSP10	hCoV-19/USA/CA-SEARCH-15520/2021	P	84	R	22	0	P84R
EPI_ISL_1512823	NSP10	hCoV-19/USA/CA-CDC-IBX111530992970/2021	P	84	A	1	0	P84A
EPI_ISL_1181372	NSP10	hCoV-19/Brazil/RJ-FIOCRUZ-23251/2020	P	86	S	978	0.014	P86S
EPI_ISL_5088114	NSP10	hCoV-19/USA/TX-HMH-MCoV-47189/2020	P	86	L	68	0.001	P86L
EPI_ISL_1820969	NSP10	hCoV-19/USA/KS-MAWD-7093230.A/2021	P	86	T	66	0.001	P86T
EPI_ISL_1403970	NSP10	hCoV-19/USA/UT-UPHL-2103387448/2021	P	86	H	56	0.001	P86H
EPI_ISL_3941718	NSP10	hCoV-19/USA/KS-KSU-2510/2021	P	86	R	1	0	P86R
EPI_ISL_6463231	NSP10	hCoV-19/Papua New Guinea/PNG380/2021	P	86	K	1	0	P86K
EPI_ISL_1179741	NSP10	hCoV-19/England/PORT-1E78D56/2021	Q	132	L	313	0.004	Q132L
EPI_ISL_1523714	NSP10	hCoV-19/USA/ME-HETL-J2394/2021	Q	132	R	122	0.002	Q132R
EPI_ISL_1456075	NSP10	hCoV-19/Netherlands/NB-RIVM-20548/2021	Q	132	H	28	0	Q132H
EPI_ISL_2312565	NSP10	hCoV-19/Greece/2024173/2020	Q	132	K	19	0	Q132K
EPI_ISL_1181565	NSP10	hCoV-19/Brazil/PR-FIOCRUZ-10360/2020	Q	132	E	2	0	Q132E
EPI_ISL_3717113	NSP10	hCoV-19/Nigeria/54gene14/2021	Q	139	H	300	0.004	Q139H
EPI_ISL_787470	NSP10	hCoV-19/USA/TX-HMH-MCoV-14185/2020	Q	139	E	1	0	Q139E
EPI_ISL_7051220	NSP10	hCoV-19/Slovakia/34206/2021	Q	139	K	1	0	Q139K
EPI_ISL_1403874	NSP10	hCoV-19/USA/UT-UPHL-2103813645/2021	Q	36	R	208	0.003	Q36R
EPI_ISL_1360095	NSP10	hCoV-19/Belgium/ULG-13206/2021	Q	36	K	44	0.001	Q36K
EPI_ISL_2129680	NSP10	hCoV-19/Germany/BY-RKI-I-145411/2021	Q	36	P	13	0	Q36P
EPI_ISL_2749083	NSP10	hCoV-19/England/PHEC-L305L3C3/2021	Q	36	L	13	0	Q36L
EPI_ISL_3775914	NSP10	hCoV-19/England/PHEC-T308T8D0/2021	Q	36	N	5	0	Q36N
EPI_ISL_1540520	NSP10	hCoV-19/Czech Republic/MOTOL-C2102-17601/2021	Q	36	H	3	0	Q36H
EPI_ISL_3299589	NSP10	hCoV-19/Sweden/03_SE600_000199808206N2/2021	Q	36	E	1	0	Q36E
EPI_ISL_1209602	NSP10	hCoV-19/Israel/CVL-1210/2021	Q	53	H	1100	0.016	Q53H
EPI_ISL_1521256	NSP10	hCoV-19/Netherlands/NH-RIVM-22429/2021	Q	53	L	129	0.002	Q53L
EPI_ISL_2001478	NSP10	hCoV-19/Italy/UMB-IZSGC-246561.1.48/2021	Q	53	R	46	0.001	Q53R
EPI_ISL_2214259	NSP10	hCoV-19/USA/TX-HMH-MCoV-38762/2021	Q	53	K	17	0	Q53K
EPI_ISL_6721136	NSP10	hCoV-19/Switzerland/ZH-ETHZ-34660715/2021	Q	65	L	24	0	Q65L
EPI_ISL_1627653	NSP10	hCoV-19/Poland/NIPH-NIH_ECDC-2609/2021	Q	65	H	9	0	Q65H
EPI_ISL_5075263	NSP10	hCoV-19/USA/TX-HMH-MCoV-43647/2020	Q	65	K	3	0	Q65K
EPI_ISL_7261598	NSP10	hCoV-19/USA/NY-Wadsworth-21100933-01/2021	Q	65	R	2	0	Q65R
EPI_ISL_3533893	NSP10	hCoV-19/Turkey/HSGM-FS8445/2021	Q	98	R	8	0	Q98R
EPI_ISL_1913072	NSP10	hCoV-19/Morocco/FMP-222/2021	Q	98	H	4	0	Q98H
EPI_ISL_5388409	NSP10	hCoV-19/USA/TX-HMH-MCoV-65744/2021	Q	98	K	2	0	Q98K
EPI_ISL_7493986	NSP10	hCoV-19/USA/OR-TRACE-LINN-051121-911/2021	Q	98	N	1	0	Q98N
EPI_ISL_1051796	NSP10	hCoV-19/England/OXON-F64724/2021	Q	98	E	1	0	Q98E
EPI_ISL_1178286	NSP10	hCoV-19/England/NORT-1BAF20F/2021	R	134	C	6260	0.089	R134C
EPI_ISL_1180102	NSP10	hCoV-19/England/SHEF-10D836F/2021	R	134	S	2227	0.031	R134S
EPI_ISL_1189621	NSP10	hCoV-19/England/MILK-133AEB2/2021	R	134	H	1122	0.016	R134H
EPI_ISL_1201652	NSP10	hCoV-19/Poland/NIPH-NIH_ECDC-295/2021	R	134	N	285	0.004	R134N
EPI_ISL_1281008	NSP10	hCoV-19/Germany/BY-RKI-I-035174/2021	R	134	L	53	0.001	R134L
EPI_ISL_2997120	NSP10	hCoV-19/England/BRBR-18DA6A8/2021	R	134	G	15	0	R134G
EPI_ISL_5347012	NSP10	hCoV-19/USA/TX-HMH-MCoV-59354/2021	R	134	Q	1	0	R134Q
EPI_ISL_5934825	NSP10	hCoV-19/Italy/CAM_IZSM_RD20702459611_CAM_IZSM_COLLI_TIGEM/2021	R	78	V	19	0	R78V
EPI_ISL_2223193	NSP10	hCoV-19/USA/TX-HMH-MCoV-40031/2020	R	78	L	9	0	R78L
EPI_ISL_1624290	NSP10	hCoV-19/USA/SC_NIDDL_14559/2020	R	78	C	6	0	R78C
EPI_ISL_5059293	NSP10	hCoV-19/USA/AZ-ASU16863/2021	R	78	S	2	0	R78S
EPI_ISL_1039251	NSP10	hCoV-19/Belgium/UZA-UA-CV0578523154/2020	S	11	A	27	0	S11A
EPI_ISL_1305291	NSP10	hCoV-19/USA/TX-HMH-MCoV-30746/2021	S	11	L	7	0	S11L
EPI_ISL_1673462	NSP10	hCoV-19/Italy/CAM-TIGEM-IZSM-COLLI-8973/2021	S	11	P	1	0	S11P
EPI_ISL_1187706	NSP10	hCoV-19/England/QEUH-1335A68/2021	S	129	G	685	0.01	S129G
EPI_ISL_1268759	NSP10	hCoV-19/Germany/NI-IOV-9967413901/2021	S	129	I	372	0.005	S129I
EPI_ISL_1181279	NSP10	hCoV-19/Germany/NW-UBI-157/2020	S	129	N	290	0.004	S129N
EPI_ISL_1760130	NSP10	hCoV-19/Turkey/HSGM-B268/2021	S	129	C	42	0.001	S129C
EPI_ISL_2308612	NSP10	hCoV-19/Italy/UMB-IZSGC-275977.1.25/2021	S	129	T	18	0	S129T
EPI_ISL_7591215	NSP10	hCoV-19/Russia/SPE-RII-2580S/2021	S	129	R	9	0	S129R
EPI_ISL_1258601	NSP10	hCoV-19/USA/NY-PRL-03_08_00P13/2021	S	15	F	17	0	S15F
EPI_ISL_5599496	NSP10	hCoV-19/Nigeria/MRL-0S-1798/2021	S	15	A	15	0	S15A
EPI_ISL_4931993	NSP10	hCoV-19/Germany/RP-RKI-I-265918/2021	S	15	T	3	0	S15T
EPI_ISL_8194867	NSP10	hCoV-19/Egypt/NRC-6469/2020	S	15	L	2	0	S15L
EPI_ISL_3922902	NSP10	hCoV-19/USA/ID-IBL-749249/2021	S	15	I	2	0	S15I
EPI_ISL_577191	NSP10	hCoV-19/England/NOTT-114712/2020	S	15	Y	1	0	S15Y
EPI_ISL_2835002	NSP10	hCoV-19/Morocco/LCAM-mohammedia_ELF-A-12/2020	S	15	P	1	0	S15P
EPI_ISL_1199225	NSP10	hCoV-19/Sweden/SE00185494/2021	S	33	N	2175	0.031	S33N
EPI_ISL_1336657	NSP10	hCoV-19/Italy/ABR-EO425/2021	S	33	G	604	0.009	S33G
EPI_ISL_2507060	NSP10	hCoV-19/Finland/THL-202111398/2021	S	33	C	81	0.001	S33C
EPI_ISL_1238740	NSP10	hCoV-19/USA/TX-HMH-MCoV-28957/2021	S	33	I	48	0.001	S33I
EPI_ISL_2242979	NSP10	hCoV-19/USA/AZ-CDC-ASC210004945/2021	S	33	R	12	0	S33R
EPI_ISL_7493989	NSP10	hCoV-19/USA/OR-TRACE-LINN-081921-939/2021	S	33	W	5	0	S33W
EPI_ISL_3299582	NSP10	hCoV-19/Sweden/03_SE600_000199832966N2/2021	S	33	T	4	0	S33T
EPI_ISL_5380454	NSP10	hCoV-19/USA/TX-HMH-MCoV-62285/2021	S	33	V	3	0	S33V
EPI_ISL_7948231	NSP10	hCoV-19/USA/MN-CDC-IBX214234319753/2021	S	33	D	2	0	S33D
EPI_ISL_1195110	NSP10	hCoV-19/Switzerland/VD-ETHZ-510370/2021	S	67	A	36	0.001	S67A
EPI_ISL_1066214	NSP10	hCoV-19/Denmark/DCGC-46704/2021	S	67	P	14	0	S67P
EPI_ISL_1794947	NSP10	hCoV-19/USA/CA-SEARCH-9214/2020	S	67	T	4	0	S67T
EPI_ISL_547877	NSP10	hCoV-19/India/TG-NIV-906/2020	S	67	Y	3	0	S67Y
EPI_ISL_5877577	NSP10	hCoV-19/USA/NC-CDC-LC0337977/2021	S	67	C	2	0	S67C
EPI_ISL_8365007	NSP10	hCoV-19/USA/AZ-TG1016388/2021	S	67	F	1	0	S67F
EPI_ISL_2223577	NSP10	hCoV-19/USA/TX-HMH-MCoV-40395/2020	S	72	L	6	0	S72L
EPI_ISL_2247743	NSP10	hCoV-19/USA/MI-CDC-STM-000068473/2021	S	72	T	2	0	S72T
EPI_ISL_2193690	NSP10	hCoV-19/USA/NJ-NYGC-NJ-BioR-601-Ampliseq/2020	S	72	P	2	0	S72P
EPI_ISL_3775914	NSP10	hCoV-19/England/PHEC-T308T8D0/2021	S	72	I	1	0	S72I
EPI_ISL_5763930	NSP10	hCoV-19/Japan/PG-136984/2021	S	72	A	1	0	S72A
EPI_ISL_1179231	NSP10	hCoV-19/Wales/PHWC-4D557A/2021	T	101	I	6633	0.094	T101I
EPI_ISL_1710838	NSP10	hCoV-19/USA/TX-UTA-000564/2021	T	101	A	58	0.001	T101A
EPI_ISL_1470176	NSP10	hCoV-19/Estonia/C043530/2021	T	101	K	6	0	T101K
EPI_ISL_2758969	NSP10	hCoV-19/Brazil/PR-FIOCRUZ-HF138/2021	T	101	N	5	0	T101N
EPI_ISL_2040254	NSP10	hCoV-19/USA/CA-CDC-ASC210029467/2021	T	101	R	1	0	T101R
EPI_ISL_7547074	NSP10	hCoV-19/USA/OR-TRACE-LINN-100921-1039/2021	T	101	Q	1	0	T101Q
EPI_ISL_7509044	NSP10	hCoV-19/USA/CA-CSMC317/2021	T	101	L	1	0	T101L
EPI_ISL_1179673	NSP10	hCoV-19/England/PORT-1E6E4C7/2021	T	102	I	13844	0.196	T102I
EPI_ISL_1266356	NSP10	hCoV-19/Slovenia/17-005382-KR/2021	T	102	N	200	0.003	T102N
EPI_ISL_1206450	NSP10	hCoV-19/England/CAMC-133FE9F/2021	T	102	A	188	0.003	T102A
EPI_ISL_1358841	NSP10	hCoV-19/Israel/CVL-5417/2021	T	102	P	45	0.001	T102P
EPI_ISL_2106988	NSP10	hCoV-19/Indonesia/JK-NIHRD-MI2103090/2021	T	102	S	29	0	T102S
EPI_ISL_7547074	NSP10	hCoV-19/USA/OR-TRACE-LINN-100921-1039/2021	T	102	L	5	0	T102L
EPI_ISL_7542775	NSP10	hCoV-19/Lithuania/S21M188/2021	T	102	M	5	0	T102M
EPI_ISL_1254711	NSP10	hCoV-19/USA/OR-TRACE-LINC-062020-048/2020	T	102	R	1	0	T102R
EPI_ISL_1184267	NSP10	hCoV-19/USA/MN-MDH-3118/2021	T	111	I	7882	0.111	T111I
EPI_ISL_1494895	NSP10	hCoV-19/Portugal/PT5233/2021	T	111	A	74	0.001	T111A
EPI_ISL_1419611	NSP10	hCoV-19/India/WB-1931500896934/2021	T	111	K	72	0.001	T111K
EPI_ISL_1885334	NSP10	hCoV-19/Denmark/DCGC-76763/2021	T	111	S	6	0	T111S
EPI_ISL_1699448	NSP10	hCoV-19/bat/Yunnan/RmYN08/2020	T	111	V	4	0	T111V
EPI_ISL_1080934	NSP10	hCoV-19/USA/TX-HMH-MCoV-25562/2021	T	111	N	2	0	T111N
EPI_ISL_7547074	NSP10	hCoV-19/USA/OR-TRACE-LINN-100921-1039/2021	T	111	H	2	0	T111H
EPI_ISL_1181069	NSP10	hCoV-19/USA/WA-UW-61767/2021	T	115	I	706	0.01	T115I
EPI_ISL_1195642	NSP10	hCoV-19/USA/ND-NDDH-0159/2021	T	115	A	151	0.002	T115A
EPI_ISL_1238482	NSP10	hCoV-19/USA/TX-HMH-MCoV-28698/2021	T	115	S	10	0	T115S
EPI_ISL_1279916	NSP10	hCoV-19/Spain/MD-IBV-99023435/2020	T	115	K	8	0	T115K
EPI_ISL_999172	NSP10	hCoV-19/Scotland/OXON-F57F3B/2021	T	115	R	1	0	T115R
EPI_ISL_7509044	NSP10	hCoV-19/USA/CA-CSMC317/2021	T	115	Q	1	0	T115Q
EPI_ISL_1231568	NSP10	hCoV-19/Bulgaria/21BG-EU_000221_Pl3/2021	T	118	I	351	0.005	T118I
EPI_ISL_1233688	NSP10	hCoV-19/Switzerland/BE-UHB-4176023201/2020	T	118	A	129	0.002	T118A
EPI_ISL_1529030	NSP10	hCoV-19/USA/WV-WVU-WV090911/2021	T	118	N	112	0.002	T118N
EPI_ISL_2343459	NSP10	hCoV-19/Greece/141108/2021	T	118	S	5	0	T118S
EPI_ISL_5111731	NSP10	hCoV-19/USA/VA-CDC-ASC210407936/2021	T	118	L	2	0	T118L
EPI_ISL_999172	NSP10	hCoV-19/Scotland/OXON-F57F3B/2021	T	118	Y	1	0	T118Y
EPI_ISL_1180134	NSP10	hCoV-19/England/TFCI-2706E8B/2021	T	12	I	14438	0.204	T12I
EPI_ISL_3274448	NSP10	hCoV-19/Ecuador/NIC-INSPI-341087/2021	T	12	S	405	0.006	T12S
EPI_ISL_2426994	NSP10	hCoV-19/USA/CA-FS25312893/2021	T	12	A	45	0.001	T12A
EPI_ISL_539492	NSP10	hCoV-19/India/UT-IMT-AU111/2020	T	12	N	29	0	T12N
EPI_ISL_1181050	NSP10	hCoV-19/USA/WA-UW-61724/2021	T	39	I	1809	0.026	T39I
EPI_ISL_1390912	NSP10	hCoV-19/Canada/QC-HSE-5524134188/2020	T	39	N	158	0.002	T39N
EPI_ISL_1537770	NSP10	hCoV-19/England/MILK-14B946D/2021	T	39	A	131	0.002	T39A
EPI_ISL_2190243	NSP10	hCoV-19/USA/TX-HMH-MCoV-31607/2020	T	39	S	13	0	T39S
EPI_ISL_1415128	NSP10	hCoV-19/India/MH-NCCS-87147/2021	T	39	L	5	0	T39L
EPI_ISL_1383749	NSP10	hCoV-19/Luxembourg/LNS6771544/2021	T	39	K	4	0	T39K
EPI_ISL_1475551	NSP10	hCoV-19/England/OXON-F7821D/2021	T	39	W	1	0	T39W
EPI_ISL_2214813	NSP10	hCoV-19/USA/TX-HMH-MCoV-39117/2020	T	39	R	1	0	T39R
EPI_ISL_7509709	NSP10	hCoV-19/USA/CA-CSMC599/2020	T	39	G	1	0	T39G
EPI_ISL_1248774	NSP10	hCoV-19/England/MILK-13252EB/2021	T	47	I	344	0.005	T47I
EPI_ISL_1278776	NSP10	hCoV-19/Israel/210594423/2021	T	47	V	304	0.004	T47V
EPI_ISL_978000	NSP10	hCoV-19/USA/CA-UCSF-UC820/2020	T	47	A	11	0	T47A
EPI_ISL_2984892	NSP10	hCoV-19/South Africa/NICD-N10585/2021	T	47	P	3	0	T47P
EPI_ISL_4605771	NSP10	hCoV-19/France/PAC-HCL021162449501/2021	T	47	R	2	0	T47R
EPI_ISL_1191173	NSP10	hCoV-19/Ireland/D-NVRL-e85IRL82365/2021	T	49	I	1055	0.015	T49I
EPI_ISL_1322759	NSP10	hCoV-19/USA/NY-NYULH833/2021	T	49	N	521	0.007	T49N
EPI_ISL_1212934	NSP10	hCoV-19/Germany/NI-RKI-I-029784/2021	T	49	A	136	0.002	T49A
EPI_ISL_784858	NSP10	hCoV-19/USA/TX-HMH-MCoV-18510/2020	T	49	S	12	0	T49S
EPI_ISL_8287406	NSP10	hCoV-19/England/PHEP-YYN3H9O/2021	T	49	V	1	0	T49V
EPI_ISL_3756846	NSP10	hCoV-19/USA/ID-IBL-746974/2021	T	49	W	1	0	T49W
EPI_ISL_5236629	NSP10	hCoV-19/USA/FL-CDC-ASC210405121/2021	T	49	R	1	0	T49R
EPI_ISL_1237905	NSP10	hCoV-19/USA/TX-HMH-MCoV-28123/2021	T	5	I	352	0.005	T5I
EPI_ISL_2621334	NSP10	hCoV-19/Bulgaria/21BG-EU_002885_Pl26/2021	T	5	A	12	0	T5A
EPI_ISL_2589970	NSP10	hCoV-19/Finland/THL-202100902/2021	T	5	S	1	0	T5S
EPI_ISL_1187223	NSP10	hCoV-19/England/CAMC-1328DC9/2021	T	51	I	7379	0.104	T51I
EPI_ISL_1205710	NSP10	hCoV-19/England/ALDP-136D900/2021	T	51	N	230	0.003	T51N
EPI_ISL_1223383	NSP10	hCoV-19/England/CAMC-135AAF4/2021	T	51	A	104	0.001	T51A
EPI_ISL_1794810	NSP10	hCoV-19/USA/CA-SEARCH-9020/2020	T	51	S	14	0	T51S
EPI_ISL_8813033	NSP10	hCoV-19/USA/OR-TRACE-LINN-092721-1198/2021	T	51	L	2	0	T51L
EPI_ISL_1184194	NSP10	hCoV-19/USA/IN-PU-LH000125118/2021	T	56	A	314	0.004	T56A
EPI_ISL_2223395	NSP10	hCoV-19/USA/TX-HMH-MCoV-40232/2020	T	56	I	4	0	T56I
EPI_ISL_1520813	NSP10	hCoV-19/Netherlands/GE-RIVM-22209/2021	T	56	S	3	0	T56S
EPI_ISL_5934821	NSP10	hCoV-19/Italy/CAM_IZSM_RD20702444222_CAM_IZSM_COLLI_TIGEM/2021	T	56	W	1	0	T56W
EPI_ISL_1185433	NSP10	hCoV-19/USA/CA-CZB-23994/2020	T	58	I	3205	0.045	T58I
EPI_ISL_1288340	NSP10	hCoV-19/Mexico/PUE-IBT-IMSS-134/2021	T	58	A	153	0.002	T58A
EPI_ISL_2304079	NSP10	hCoV-19/India/MH-NCCS-263182/2021	T	58	K	4	0	T58K
EPI_ISL_1448392	NSP10	hCoV-19/USA/WA-UW-67931/2021	V	108	M	41	0.001	V108M
EPI_ISL_1202318	NSP10	hCoV-19/USA/TX-HMH-MCoV-16608/2020	V	108	L	20	0	V108L
EPI_ISL_2968040	NSP10	hCoV-19/Morocco/HMIMV-62E/2020	V	108	A	5	0	V108A
EPI_ISL_1080934	NSP10	hCoV-19/USA/TX-HMH-MCoV-25562/2021	V	108	G	4	0	V108G
EPI_ISL_8150022	NSP10	hCoV-19/USA/FL-CDC-ASC210536462/2021	V	108	W	3	0	V108W
EPI_ISL_1181442	NSP10	hCoV-19/Brazil/RJ-FIOCRUZ-16517/2020	V	116	F	249	0.004	V116F
EPI_ISL_1301610	NSP10	hCoV-19/Mexico/CMX-INER-IBT-20/2020	V	116	I	224	0.003	V116I
EPI_ISL_1266302	NSP10	hCoV-19/Slovenia/17-010364-CE/2021	V	116	A	114	0.002	V116A
EPI_ISL_3750028	NSP10	hCoV-19/USA/ID-CDC-LC0182280/2021	V	116	G	99	0.001	V116G
EPI_ISL_6567534	NSP10	hCoV-19/USA/CA-CDPH-3000266364/2021	V	116	L	7	0	V116L
EPI_ISL_1180963	NSP10	hCoV-19/USA/WA-UW-61470/2021	V	119	I	1380	0.02	V119I
EPI_ISL_8525469	NSP10	hCoV-19/Senegal/1187/2020	V	119	A	50	0.001	V119A
EPI_ISL_6068692	NSP10	hCoV-19/USA/MD-CDC-ASC210341727/2021	V	119	L	48	0.001	V119L
EPI_ISL_3079012	NSP10	hCoV-19/England/OXON-FA2757/2021	V	119	G	15	0	V119G
EPI_ISL_1258948	NSP10	hCoV-19/USA/NY-PRL-03_05_01I09/2021	V	119	F	9	0	V119F
EPI_ISL_5235856	NSP10	hCoV-19/USA/FL-CDC-ASC210083721/2021	V	119	S	4	0	V119S
EPI_ISL_5111731	NSP10	hCoV-19/USA/VA-CDC-ASC210407936/2021	V	119	P	1	0	V119P
EPI_ISL_1441019	NSP10	hCoV-19/Germany/SN-RKI-I-057315/2021	V	13	I	200	0.003	V13I
EPI_ISL_1008045	NSP10	hCoV-19/Austria/CeMM2693/2021	V	13	A	72	0.001	V13A
EPI_ISL_1317825	NSP10	hCoV-19/Norway/2266/2021	V	13	L	15	0	V13L
EPI_ISL_1141009	NSP10	hCoV-19/Germany/BY-RKI-I-010881/2021	V	13	E	1	0	V13E
EPI_ISL_1196069	NSP10	hCoV-19/USA/MD-IGS-012100507459A/2021	V	21	I	241	0.003	V21I
EPI_ISL_1493590	NSP10	hCoV-19/Brazil/SP-C2145/2021	V	21	A	16	0	V21A
EPI_ISL_1265168	NSP10	hCoV-19/Indonesia/BA-NIHRD-WGS00740/2021	V	21	L	9	0	V21L
EPI_ISL_3411126	NSP10	hCoV-19/USA/WA-CDC-UW21073080183/2021	V	21	Q	1	0	V21Q
EPI_ISL_5337586	NSP10	hCoV-19/USA/TX-HMH-MCoV-54027/2021	V	21	G	1	0	V21G
EPI_ISL_1842379	NSP10	hCoV-19/Finland/V650/2021	V	42	I	89	0.001	V42I
EPI_ISL_793251	NSP10	hCoV-19/Denmark/DCGC-23745/2020	V	42	L	11	0	V42L
EPI_ISL_8810872	NSP10	hCoV-19/France/ARA-HCL1039901/2021	V	42	F	1	0	V42F
EPI_ISL_1216432	NSP10	hCoV-19/Germany/BY-RKI-I-032249/2021	V	57	I	143	0.002	V57I
EPI_ISL_1300020	NSP10	hCoV-19/Czech Republic/FNB14550/2021	V	57	F	72	0.001	V57F
EPI_ISL_1260585	NSP10	hCoV-19/Switzerland/ZH-ETHZ-510652/2020	V	57	A	26	0	V57A
EPI_ISL_2221814	NSP10	hCoV-19/USA/TX-HMH-MCoV-39623/2020	V	57	L	5	0	V57L
EPI_ISL_1225321	NSP10	hCoV-19/USA/GA-GPHL-0020/2020	V	7	L	297	0.004	V7L
EPI_ISL_1915570	NSP10	hCoV-19/Indonesia/BA-NIHRD-WGS02468/2021	V	7	M	69	0.001	V7M
EPI_ISL_577191	NSP10	hCoV-19/England/NOTT-114712/2020	V	7	A	5	0	V7A
EPI_ISL_1351485	NSP10	hCoV-19/Germany/NI-RKI-I-044269/2021	V	97	A	664	0.009	V97A
EPI_ISL_1467599	NSP10	hCoV-19/England/CAMC-1381C67/2021	V	97	I	176	0.002	V97I
EPI_ISL_1235498	NSP10	hCoV-19/USA/CA-CZB-25790/2021	V	97	L	131	0.002	V97L
EPI_ISL_7547074	NSP10	hCoV-19/USA/OR-TRACE-LINN-100921-1039/2021	V	97	Y	1	0	V97Y
EPI_ISL_7493986	NSP10	hCoV-19/USA/OR-TRACE-LINN-051121-911/2021	V	97	T	1	0	V97T
EPI_ISL_2224798	NSP10	hCoV-19/USA/TX-HMH-MCoV-41061/2020	W	123	R	19	0	W123R
EPI_ISL_1585044	NSP10	hCoV-19/USA/KS-KSU-4889/2021	W	123	C	10	0	W123C
EPI_ISL_5462906	NSP10	hCoV-19/Italy/CAM_IZSM_RD20702459413/2021	W	123	Q	9	0	W123Q
EPI_ISL_4186157	NSP10	hCoV-19/USA/CA-CDC-ASC210244268/2021	W	123	E	3	0	W123E
EPI_ISL_5235941	NSP10	hCoV-19/USA/MI-CDC-ASC210405263/2021	W	123	V	2	0	W123V
EPI_ISL_5053934	NSP10	hCoV-19/USA/CA-SCPHL-21WGS0587/2021	W	123	G	1	0	W123G
EPI_ISL_439493	NSP10	hCoV-19/England/CAMB-778A2/2020	W	123	L	1	0	W123L
EPI_ISL_5691210	NSP10	hCoV-19/France/BFC-HMN-21092010434/2021	W	123	S	1	0	W123S
EPI_ISL_1283039	NSP10	hCoV-19/Germany/BE-RKI-I-037192/2021	Y	126	C	103	0.001	Y126C
EPI_ISL_8194869	NSP10	hCoV-19/Egypt/NRC-6359/2020	Y	126	D	16	0	Y126D
EPI_ISL_1185040	NSP10	hCoV-19/USA/CA-CZB-22380/2021	Y	126	H	14	0	Y126H
EPI_ISL_5934808	NSP10	hCoV-19/Italy/CAM_IZSM_RD20702644480_CAM_IZSM_COLLI_TIGEM/2021	Y	126	F	13	0	Y126F
EPI_ISL_2031279	NSP10	hCoV-19/USA/WA-UW-21042244724/2021	Y	126	S	4	0	Y126S
EPI_ISL_2201005	NSP10	hCoV-19/USA/TX-HMH-MCoV-33697/2020	Y	126	W	3	0	Y126W
EPI_ISL_5235941	NSP10	hCoV-19/USA/MI-CDC-ASC210405263/2021	Y	126	V	2	0	Y126V
EPI_ISL_7509044	NSP10	hCoV-19/USA/CA-CSMC317/2021	Y	126	N	1	0	Y126N
EPI_ISL_1235838	NSP10	hCoV-19/USA/TX-HMH-MCoV-26058/2021	Y	27	T	14	0	Y27T
EPI_ISL_485957	NSP10	hCoV-19/USA/un-UW-2847/2020	Y	27	Q	8	0	Y27Q
EPI_ISL_3267717	NSP10	hCoV-19/Sweden/Uppsala-000199811713N2/2021	Y	27	W	6	0	Y27W
EPI_ISL_1534536	NSP10	hCoV-19/Cambodia/313050/2021	Y	27	H	3	0	Y27H
EPI_ISL_1915570	NSP10	hCoV-19/Indonesia/BA-NIHRD-WGS02468/2021	Y	27	D	2	0	Y27D
EPI_ISL_3299585	NSP10	hCoV-19/Sweden/03_SE600_000199825408N2/2021	Y	27	C	2	0	Y27C
EPI_ISL_5216723	NSP10	hCoV-19/USA/IL-CDC-ASC210186447/2021	Y	27	A	1	0	Y27A
EPI_ISL_3922920	NSP10	hCoV-19/USA/ID-IBL-749558/2021	Y	27	L	1	0	Y27L
EPI_ISL_1257175	NSP10	hCoV-19/England/QEUH-12D35E4/2021	Y	30	C	62	0.001	Y30C
EPI_ISL_3434877	NSP10	hCoV-19/Brazil/AL-FIOCRUZ-39943/2021	Y	30	H	8	0	Y30H
EPI_ISL_485957	NSP10	hCoV-19/USA/un-UW-2847/2020	Y	30	N	6	0	Y30N
EPI_ISL_5142916	NSP10	hCoV-19/United Arab Emirates/BTC-5043/2021	Y	30	F	1	0	Y30F
EPI_ISL_3299585	NSP10	hCoV-19/Sweden/03_SE600_000199825408N2/2021	Y	30	G	1	0	Y30G
EPI_ISL_7509452	NSP10	hCoV-19/USA/CA-CSMC465/2020	Y	30	W	1	0	Y30W
EPI_ISL_1346613	NSP10	hCoV-19/USA/WA-UW-64069/2021	Y	76	H	54	0.001	Y76H
EPI_ISL_1237313	NSP10	hCoV-19/USA/TX-HMH-MCoV-27531/2021	Y	76	L	20	0	Y76L
EPI_ISL_2715982	NSP10	hCoV-19/USA/NY-PRL-2021_0624_51L13/2021	Y	76	C	4	0	Y76C
EPI_ISL_1074466	NSP10	hCoV-19/USA/TX-HMH-MCoV-20027/2021	Y	76	F	2	0	Y76F
EPI_ISL_1002055	NSP10	hCoV-19/Switzerland/SH-ETHZ-461012/2021	Y	96	H	3	0	Y96H
EPI_ISL_3411120	NSP10	hCoV-19/USA/WA-CDC-UW21073038462/2021	Y	96	C	3	0	Y96C
EPI_ISL_3411100	NSP10	hCoV-19/USA/WA-CDC-UW21073158486/2021	Y	96	R	1	0	Y96R
EPI_ISL_2657730	NSP10	hCoV-19/Spain/CL-COV00598/2021	Y	96	S	1	0	Y96S
		NSP10_G35del
