# Supplementary material for: Emerging variants of SARS-CoV-2 NSP10 highlight strong functional conservation of its binding to two non-structural proteins, NSP14 and NSP16
Source: eLife. 2023 Dec 21;12:RP87884. doi: 10.7554/eLife.87884 (PMC10735223; doi:10.7554/eLife.87884)
Supplement: Figure 2—source data 3. — The percent frequency and effect on calculated protein stability are shown. Only mutations with a count larger than 1000 and a percent frequency larger than 0.01% have been included. Residues for which no structure was available have been left blank. [file elife-87884-fig2-data3.xlsx]

## Sheet: Sheet1
Mutation	Count	% Frequency	𝚫𝚫Gstability (kcal/mol)	Predicted effect on NSP10 stability	NSP10-NSP14		NSP10-NSP16
					Interface	Deleterious	Interface	Deleterious
T102I	21615	0.166	-0.11	destabilizing	N	N	N	N
T12I	17120	0.131	-0.68	destabilizing	Y	N	N	N
A104V	13988	0.107	-0.1	destabilizing	N	N	N	N
A32V	12110	0.093	-0.79	destabilizing	N	N	N	N
T51I	11050	0.085	-0.61	destabilizing	N	N	N	N
T101I	10531	0.081	-0.21	destabilizing	N	N	N	N
T111I	10420	0.08	0.57	stabilizing	N	N	N	N
I55T	6814	0.052	-1.75	destabilizing	N	N	N	N
T58I	6673	0.051	-0.44	destabilizing	Y	N	N	N
I38V	5610	0.043	-1.54	destabilizing	N	N	N	N
P84S	5222	0.04	-0.18	destabilizing	N	N	N	N
T49I	3194	0.025	-0.62	destabilizing	N	N	N	N
K95R	2979	0.023	-0.41	destabilizing	Y	N	N	N
P84L	2896	0.022	-0.29	destabilizing	N	N	N	N
V119I	2805	0.022	-0.14	destabilizing	N	N	N	N
S33N	2633	0.02	0.13	stabilizing	Y	N	N	N
T39I	2116	0.02	-0.24	destabilizing	N	N	N	N
A32T	2386	0.018	0.1	stabilizing	N	N	N	N
G121S	2256	0.017	-0.47	destabilizing	N	N	N	N
G34R	2188	0.017	-0.33	destabilizing	Y	N	N	N
T115I	1789	0.014	-0.59	destabilizing	N	N	N	N
I81T	1773	0.014	-1.22	destabilizing	Y	N	N	N
P37S	1679	0.013	-1.33	destabilizing	N	N	N	N
T118A	1625	0.012	-0.3	destabilizing	N	N	N	N
A24S	1613	0.012	-1.07	destabilizing	N	N	N	N
H48Y	1553	0.012	-0.22	destabilizing	Y	N	Y	N
M122I	1382	0.011	-0.2	destabilizing	N	N	N	N
A24V	1304	0.01	-1.32	destabilizing	N	N	N	N
G121C	1239	0.01	-0.34	destabilizing	N	N	N	N
R134C	7953	0.061			N		N
L138F	7072	0.054			N		N
R134S	3056	0.023			N		N
P8S	2050	0.016			Y		N
R134H	1894	0.015			N		N
P136S	1573	0.012			N		N
M137I	1495	0.011			N		N
P136L	1446	0.011			N		N
A4V	2055	0.016			N		N
L133F	4060	0.031			N		N
